# Supplementary material
Source: PubMed Central journal article supplement (PMC7396311)
Supplement: NIHMS1552316-supplement-supplement.pdf [file NIHMS1552316-supplement-supplement.pdf]

## Supplementary Information

**Figure S1.** Daily measured gamma data (blue dots) from RadNet and background radiation (red line) during study period using REBS method with 90-day bandwidth.

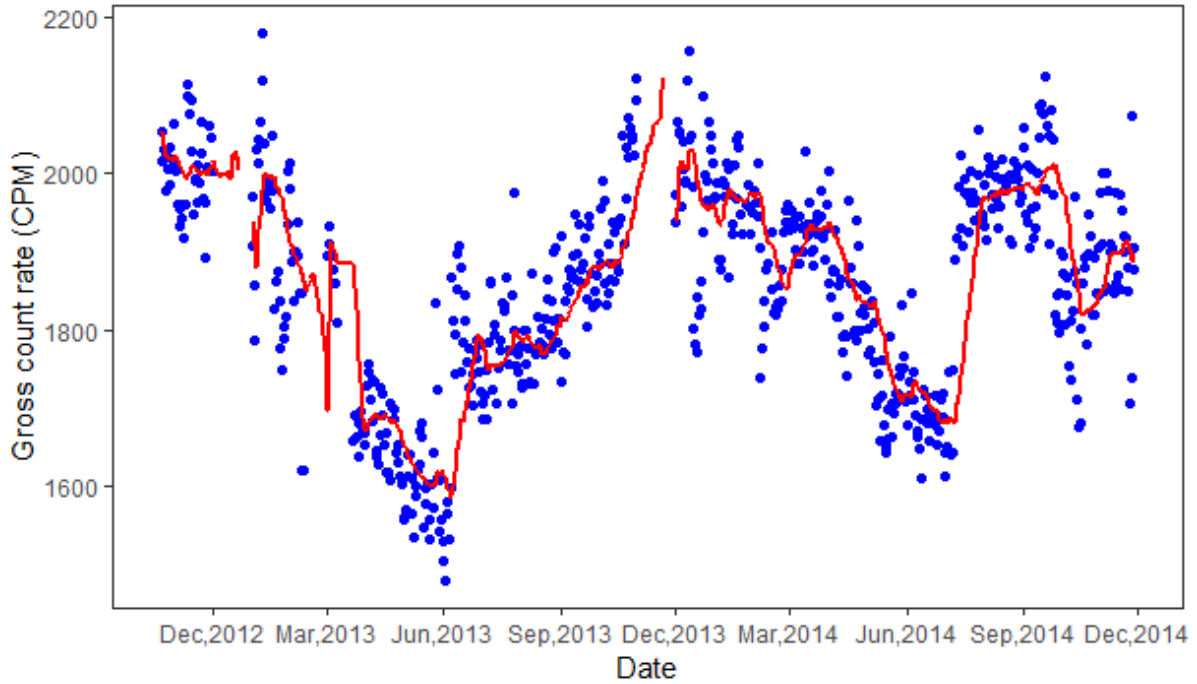

(a) Gamma-3

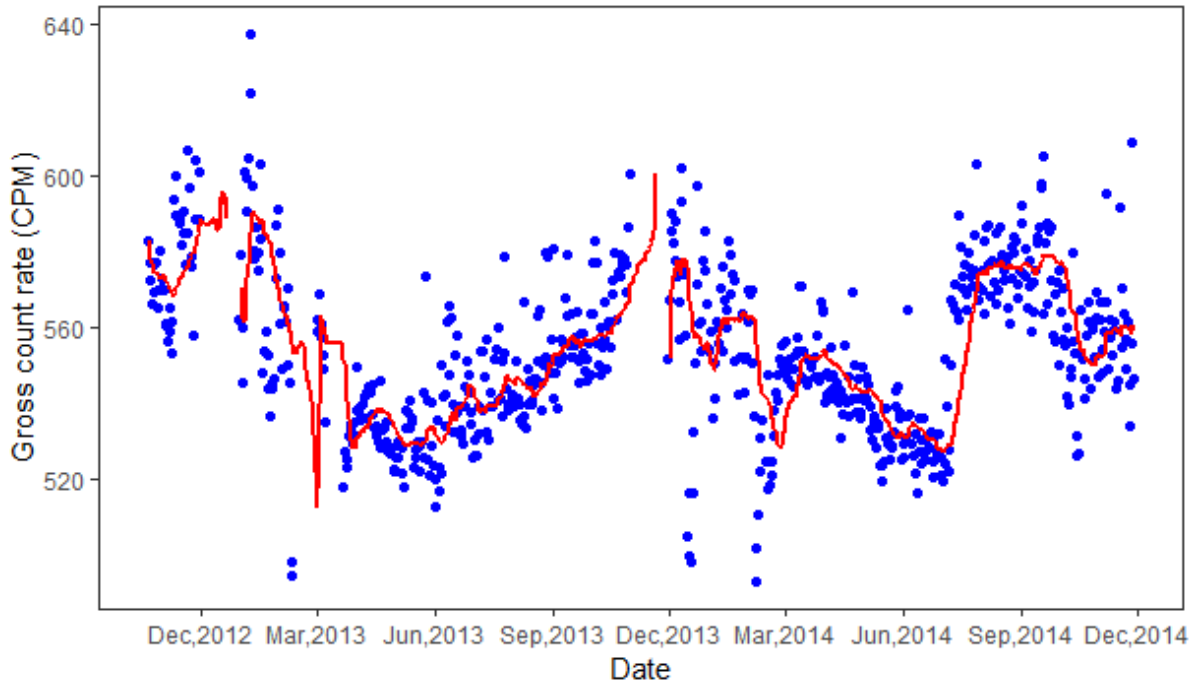

(b) Gamma-4

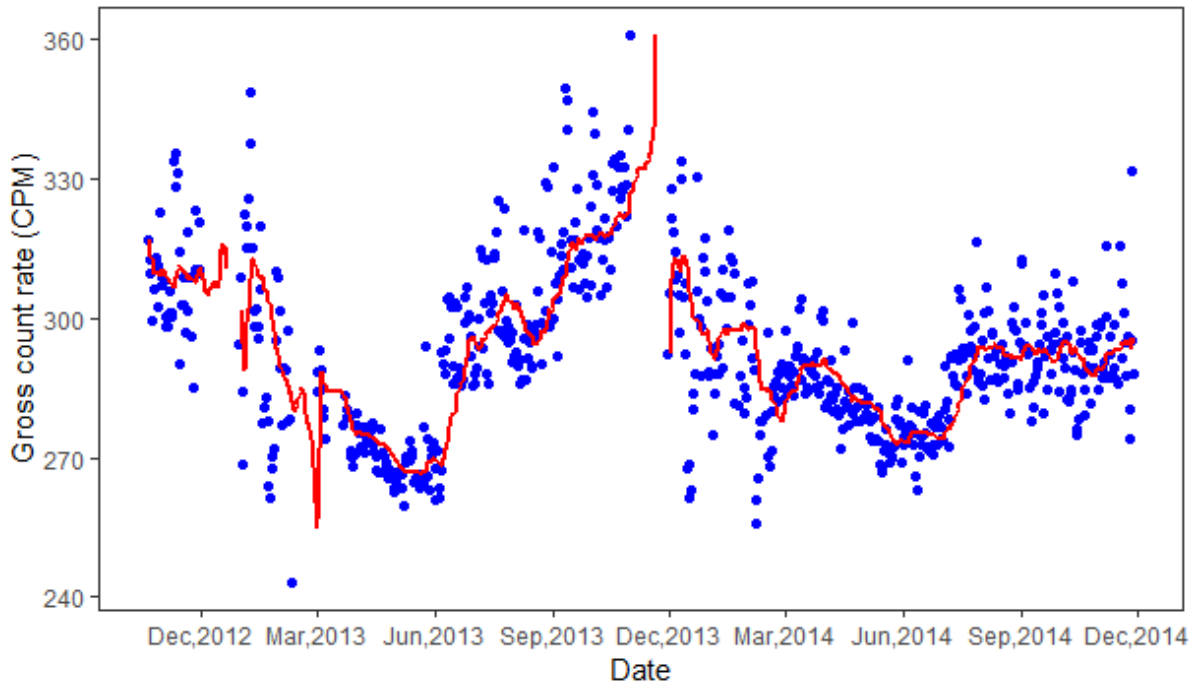

(c) Gamma-5

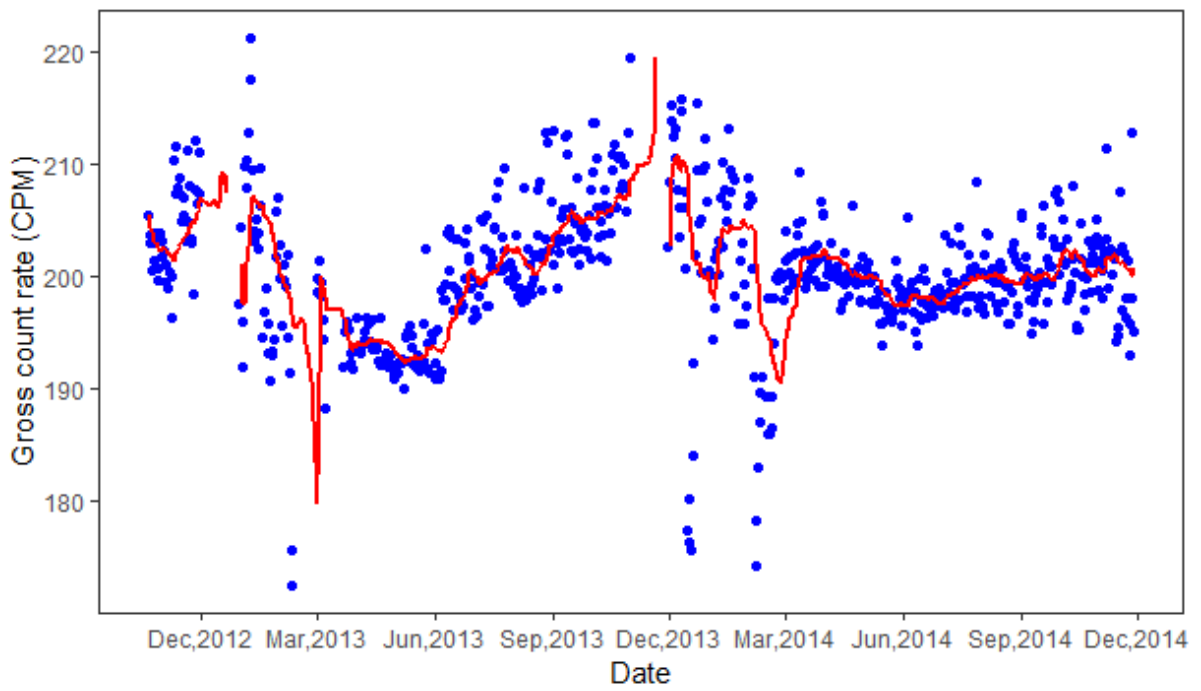

(d) Gamma-6

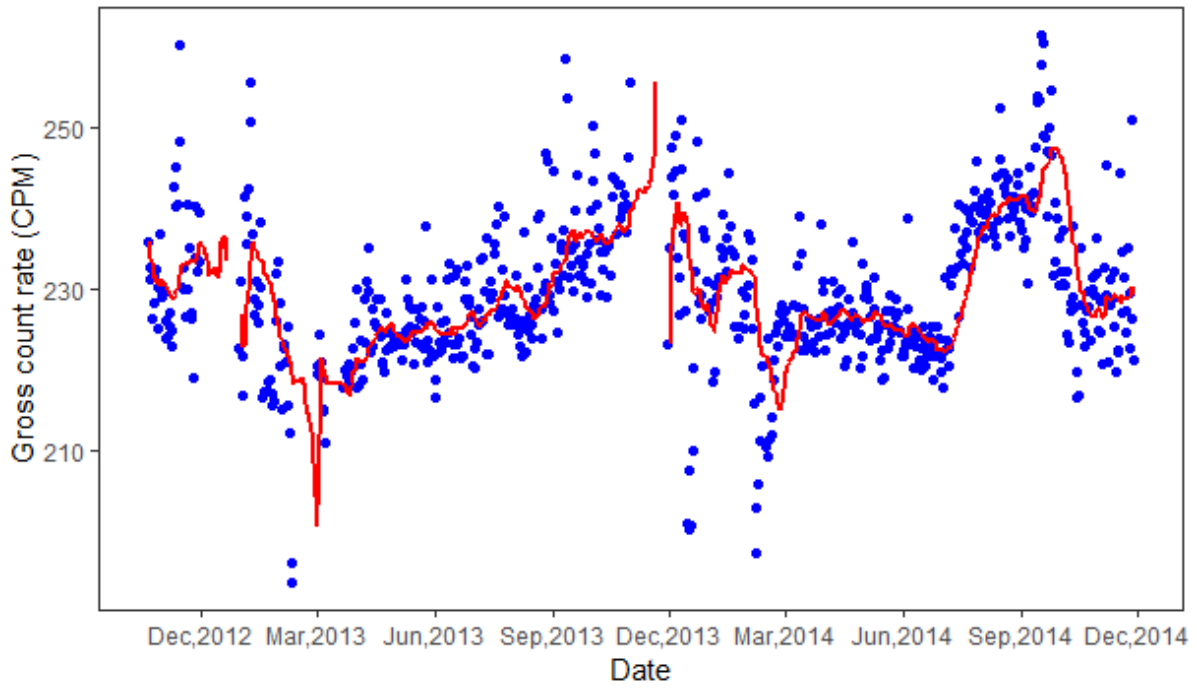

(e) Gamma-7

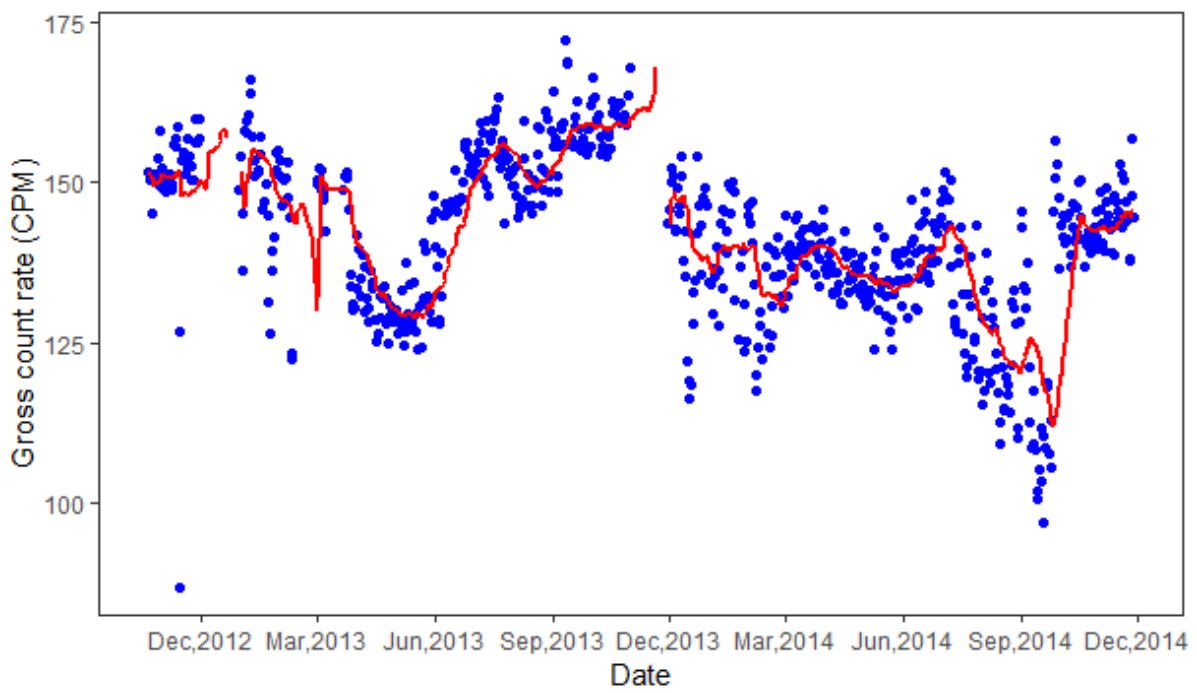

(f) Gamma-8

**Figure S2.** Flow chart of participants in the cohort

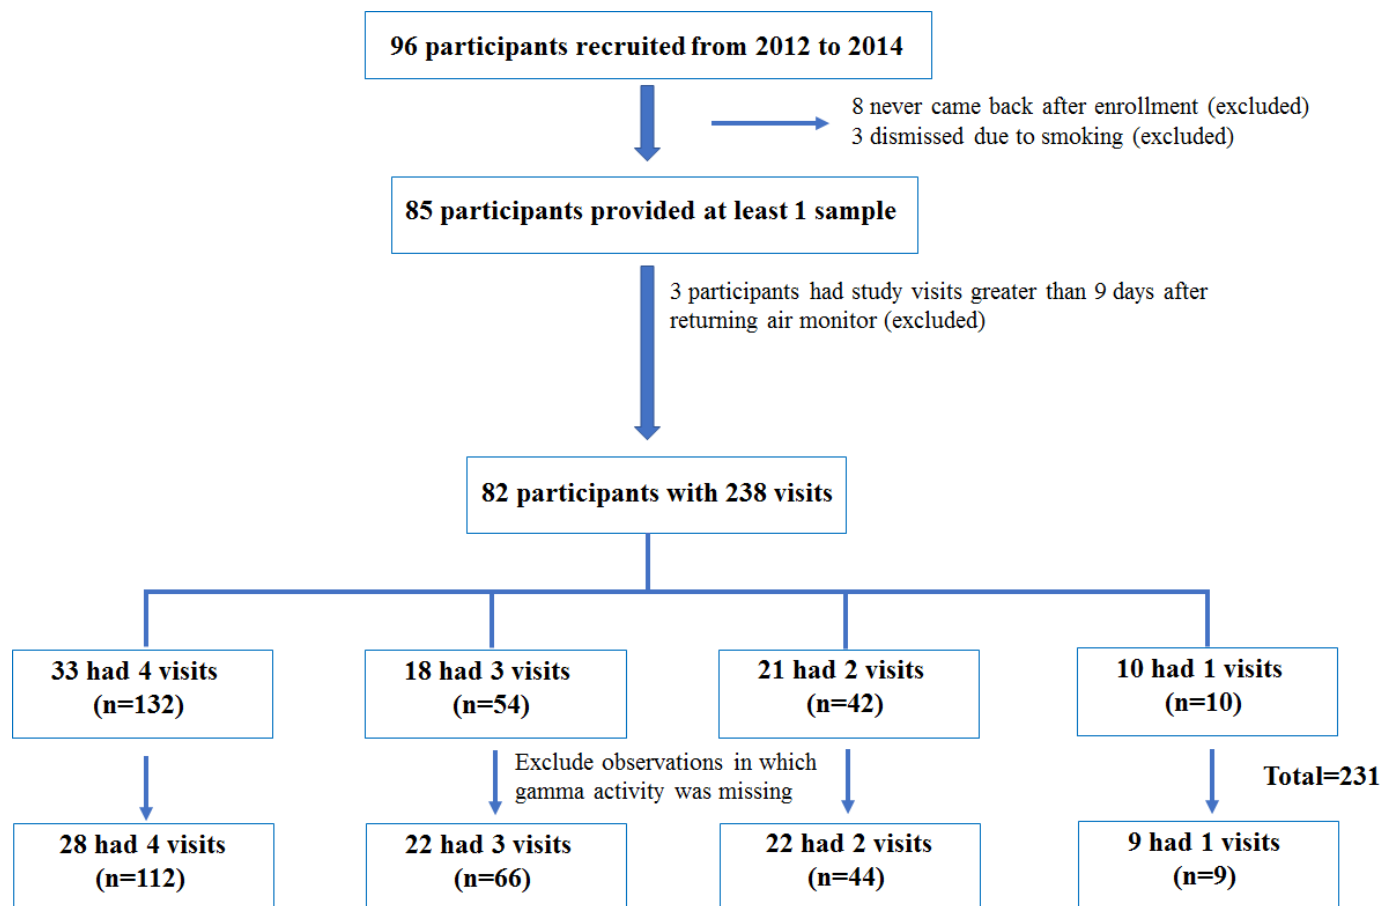

**Figure S3.** Percentage changes in 8-OHdG with per IQR increase in exposures to PM gamma activities (gamma-3 through gamma-9) for daily moving averages starting with the day of urine collection (day 0) through 7 days before urine collection (day 7), adjusted for weekly PM<sub>2.5</sub>.

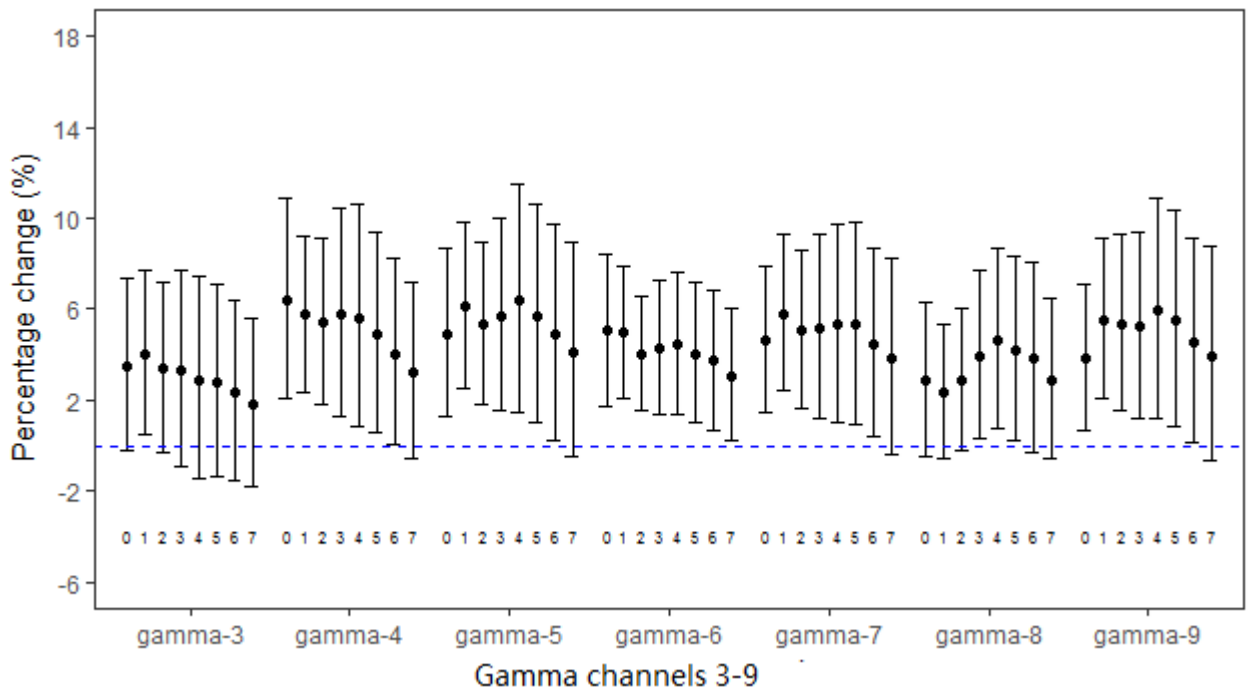

(a) Effect of ambient PM gamma activities adjusted for ambient PM<sub>2.5</sub>

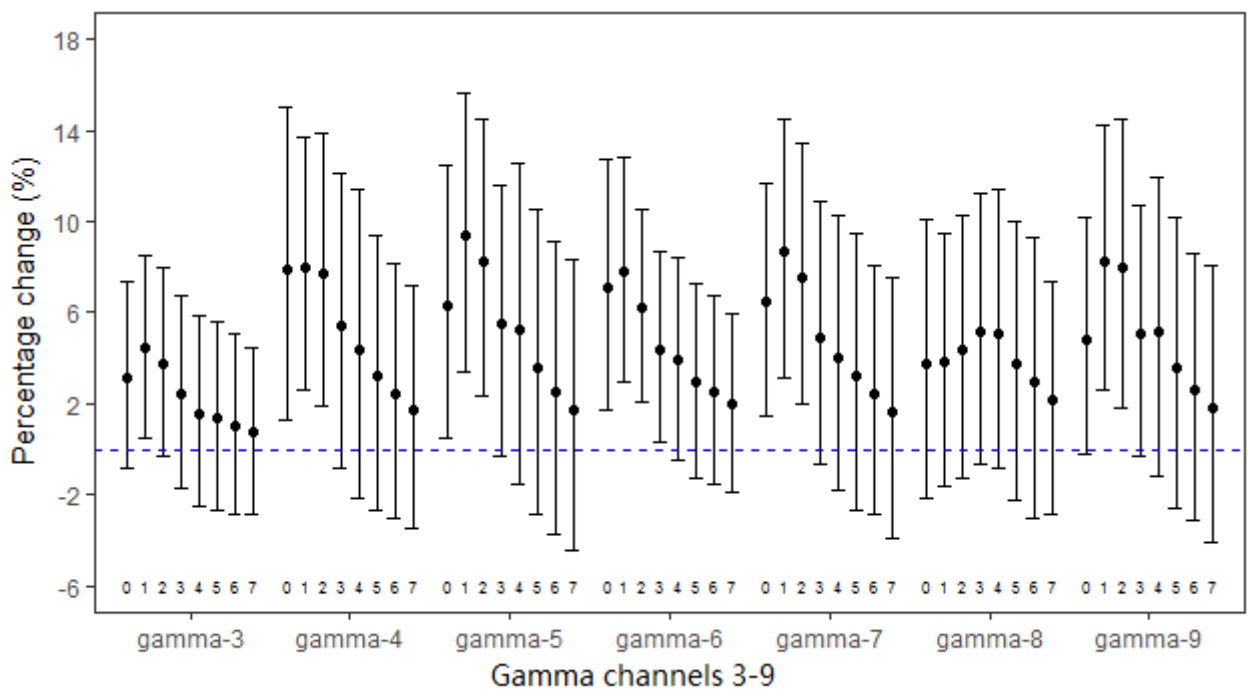

(b) Effect of indoor PM gamma activities adjusted for indoor PM<sub>2.5</sub>

**Figure S4.** Percentage changes in MDA with per IQR increase in exposures to PM gamma activities, gamma-3 through gamma-9) for daily moving averages starting with the day of urine collection (day 0) through 7 days before urine collection (day 7), adjusted for weekly PM<sub>2.5</sub>.

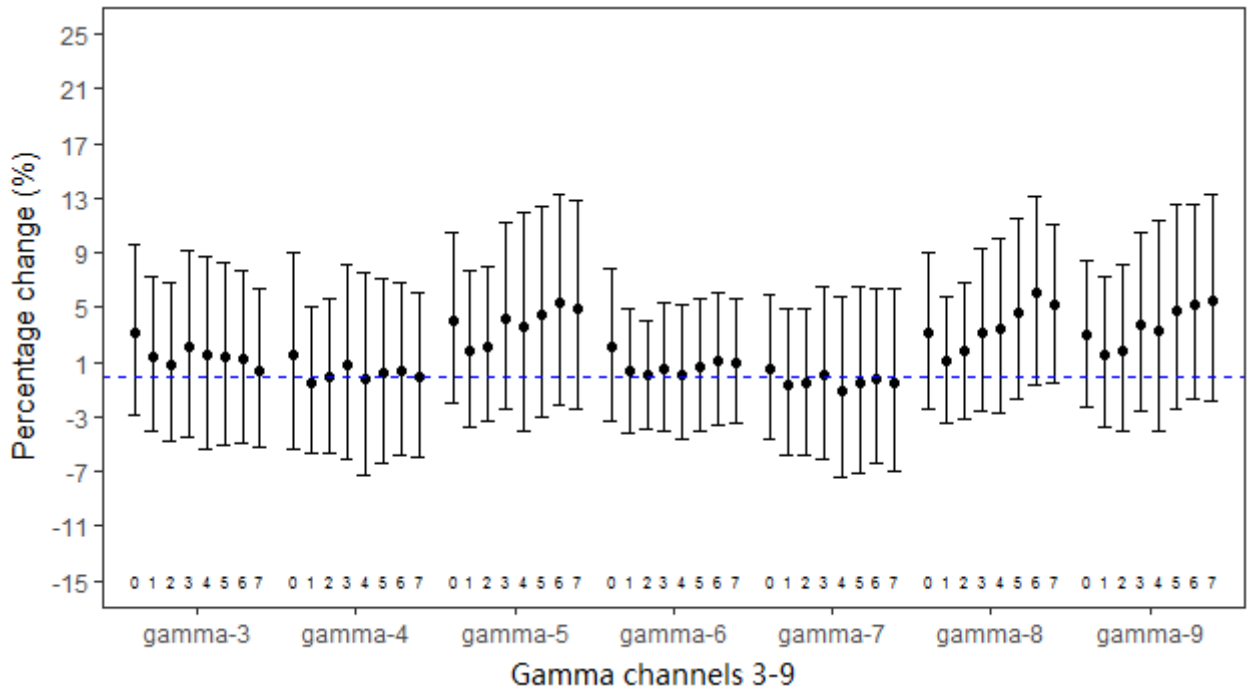

(a) Effect of ambient PM gamma activities adjusted for ambient PM<sub>2.5</sub>

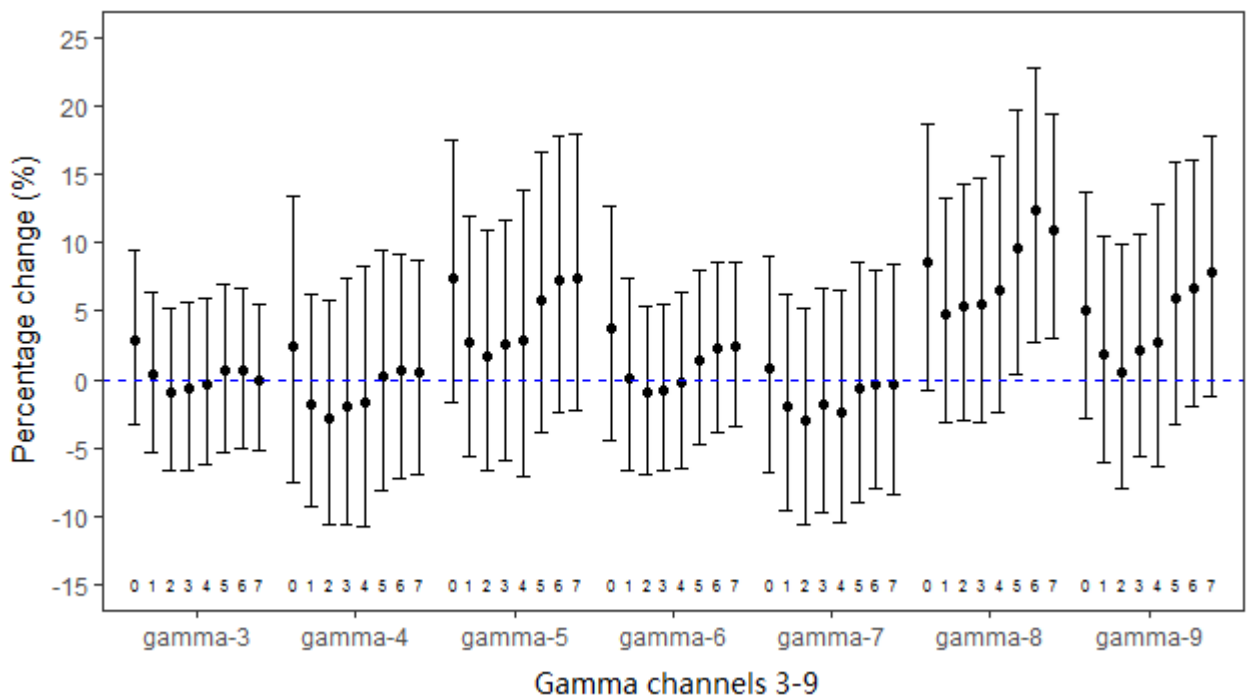

(b) Effect of indoor PM gamma activities adjusted for indoor PM<sub>2.5</sub>

**Figure S5.** Percentage changes in 8-OHdG with per IQR increase in exposures to PM gamma activities, gamma-3 through gamma-9) for daily moving averages starting with the day of urine collection (day 0) through 7 days before urine collection (day 7), adjusted for weekly NO<sub>2</sub>.

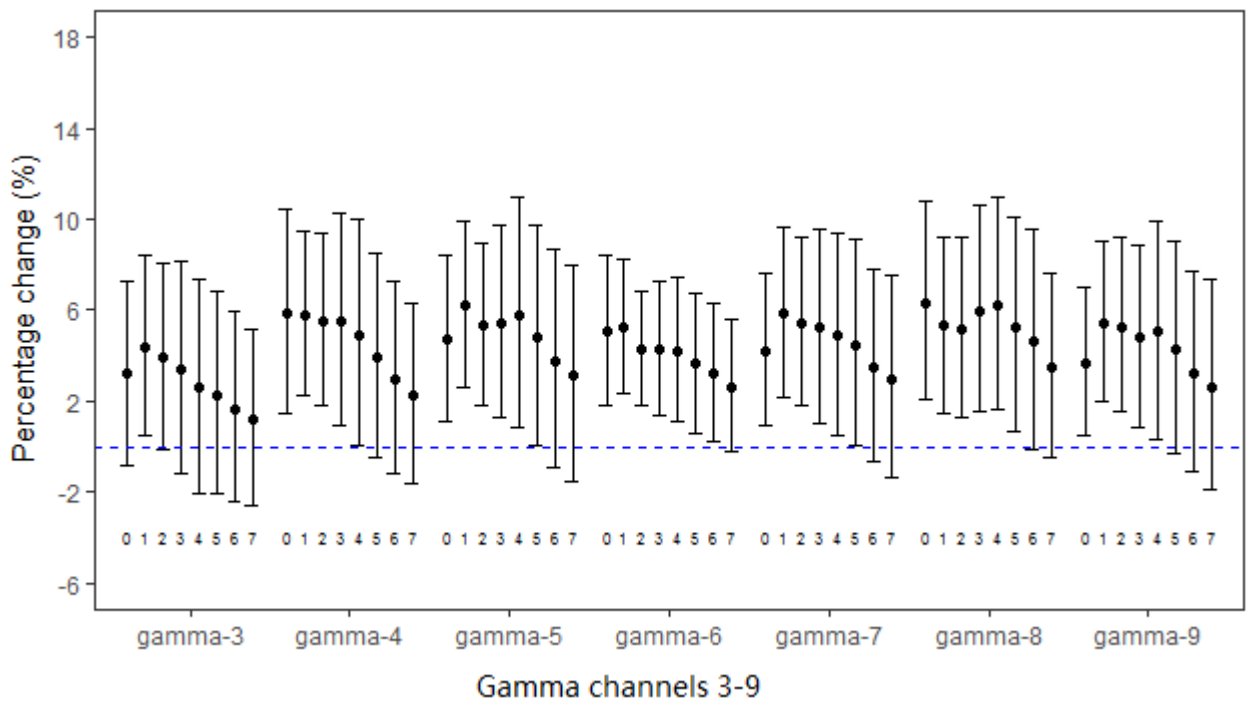

(a) Effect of ambient PM gamma activities adjusted for ambient NO<sub>2</sub>

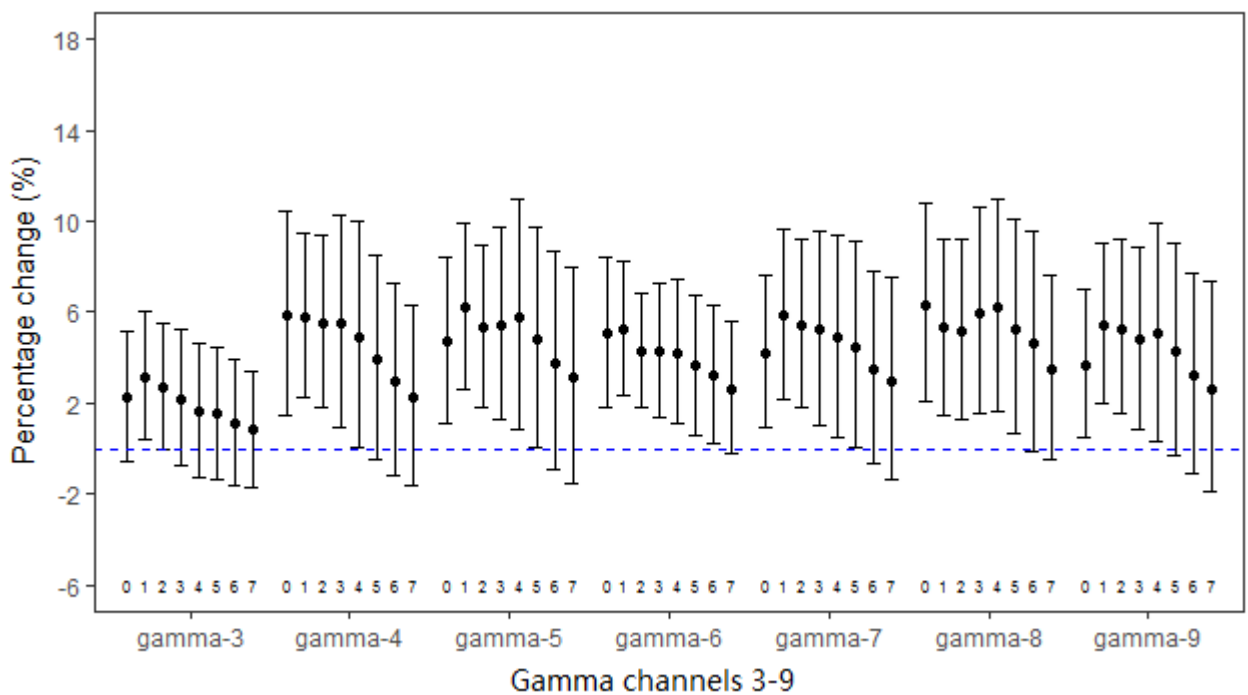

(b) Effect of indoor PM gamma activities adjusted for indoor NO<sub>2</sub>

**Figure S6.** Percentage changes in MDA with per IQR increase in exposures to PM gamma activities, gamma-3 through gamma-9) for daily moving averages starting with the day of urine collection (day 0) through 7 days before urine collection (day 7), adjusted for weekly NO<sub>2</sub>.

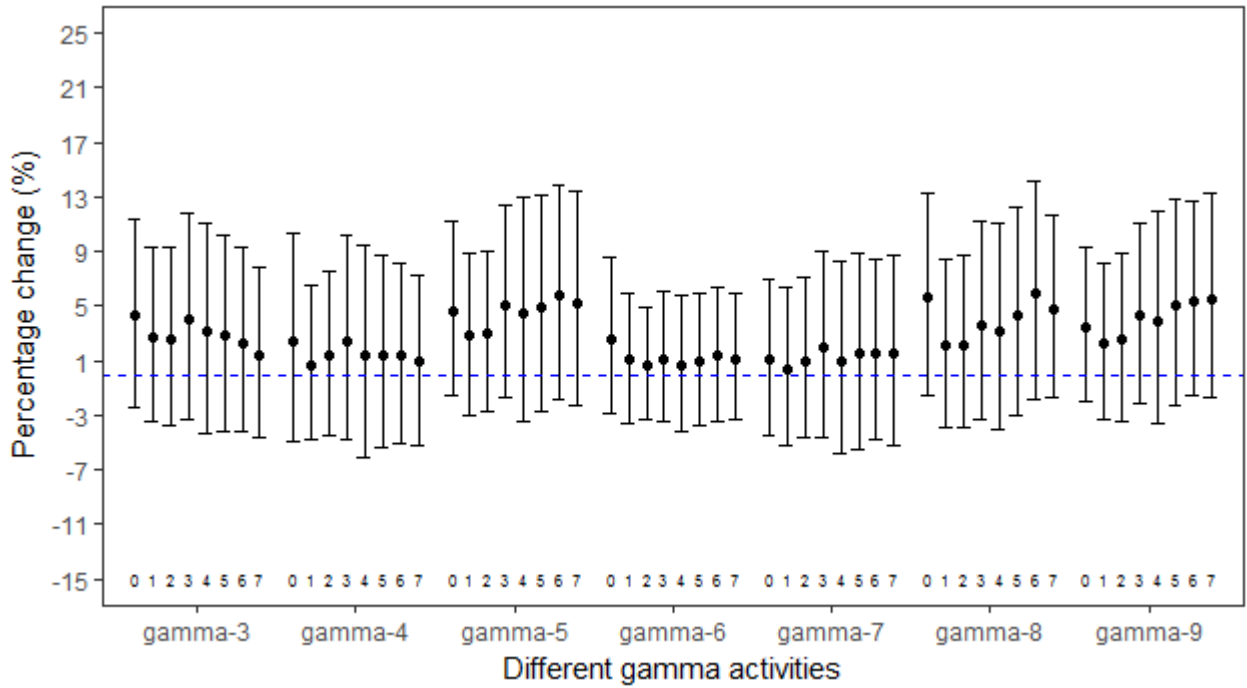

(a) Effect of ambient PM gamma activities adjusted ambient NO<sub>2</sub>

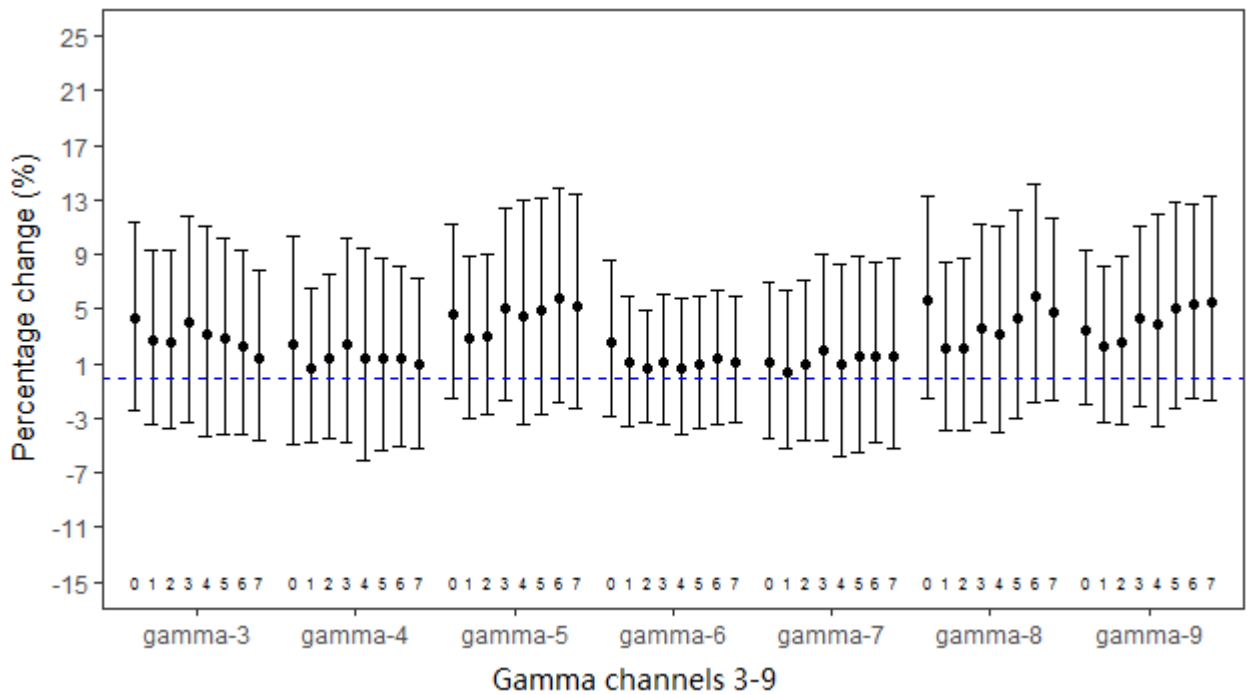

(b) Effect of indoor PM gamma activities adjusted for indoor NO<sub>2</sub>



**Figure S7.** Percentage changes in 8-OHdG with per IQR increase in exposures to PM gamma activities, (gamma-3 through gamma-9) for daily moving averages starting with the day of urine collection (day 0) through 7 days before urine collection (day 7), adjusted for weekly O<sub>3</sub>.

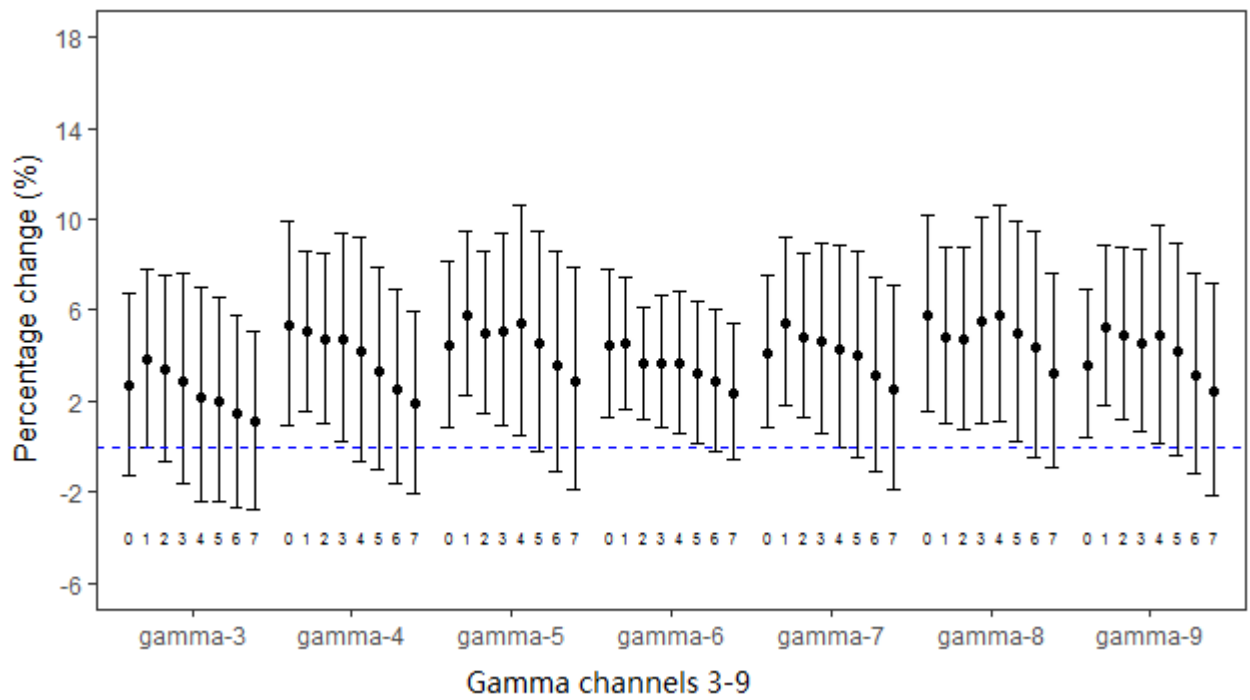

Effect of ambient PM gamma activities adjusted for ambient O<sub>3</sub>

**Figure S8.** Percentage changes in MDA with per IQR increase in exposures to PM gamma activities, (gamma-3 through gamma-9) for daily moving averages starting with the day of urine collection (day 0) through 7 days before urine collection (day 7),. adjusted for weekly O<sub>3</sub>.

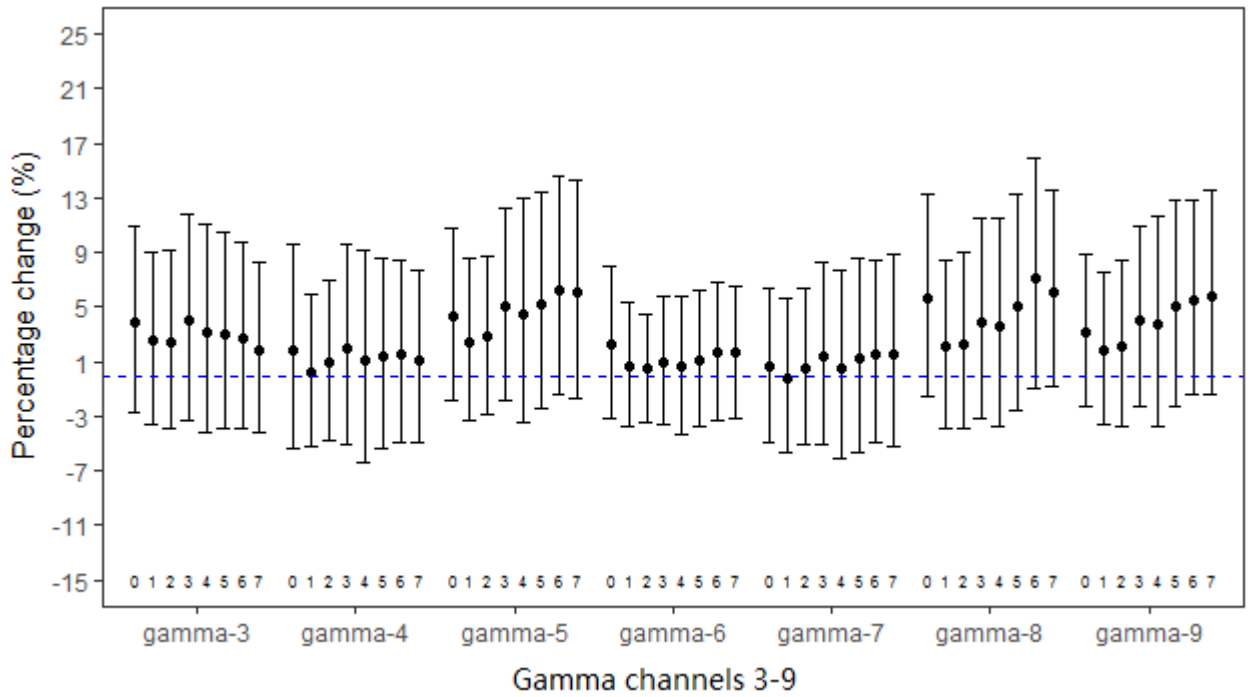

Effect of ambient PM gamma activities adjusted for ambient O<sub>3</sub>

**Figure S9.** Percentage changes in 8-OHdG with per IQR increase in exposures to PM gamma activities, (gamma-3 through gamma-9) for daily moving averages starting with the day of urine collection (day 0) through 7 days before urine collection (day 7), unadjusted for other pollutants.

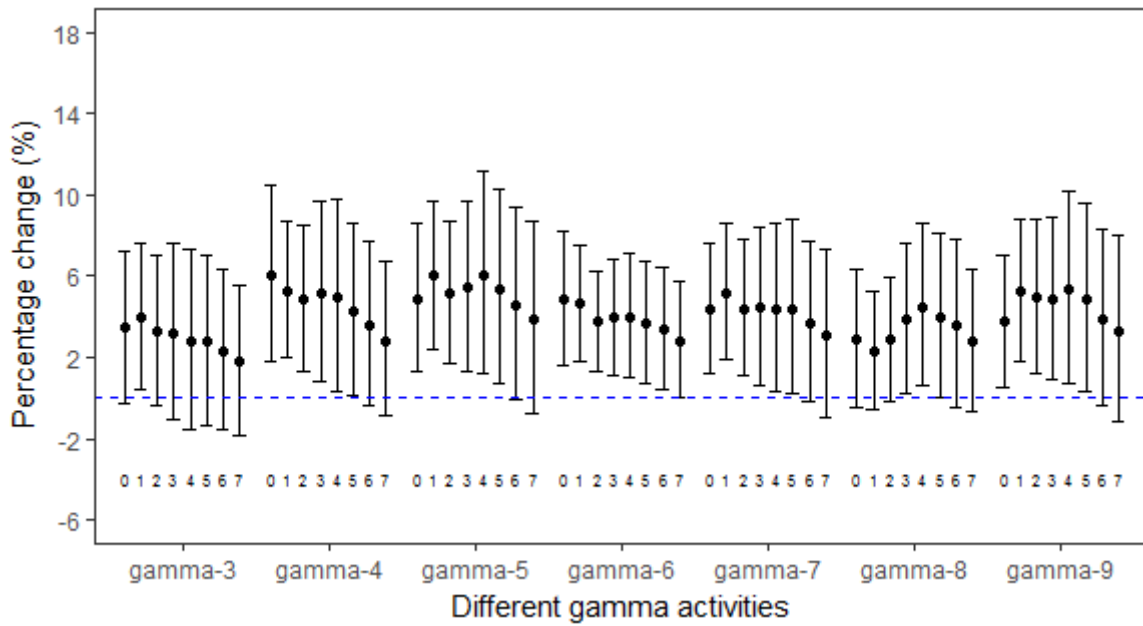

(a) Effect of ambient PM gamma activities for unadjusted models

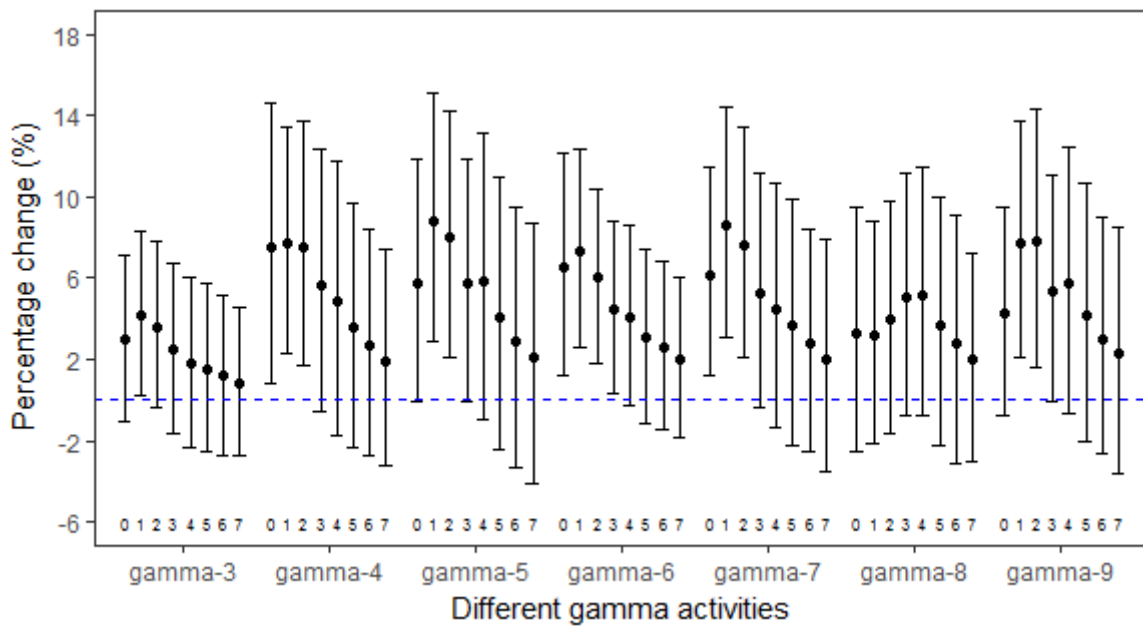

(b) Effect of indoor PM gamma activities for unadjusted models

**Figure S10.** Percentage changes in MDA with per IQR increase in exposures to PM gamma activities, (gamma-3 through gamma-9) for daily moving averages starting with the day of urine collection (day 0) through 7 days before urine collection (day 7), unadjusted for other pollutants.

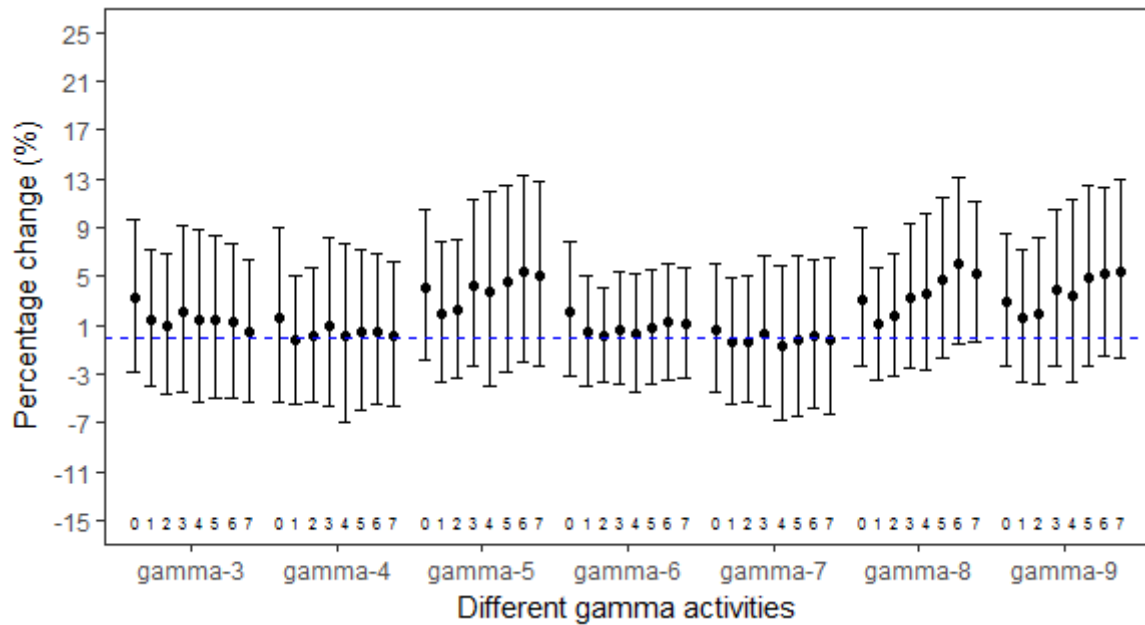

(a) Effect of ambient PM gamma activities for unadjusted models

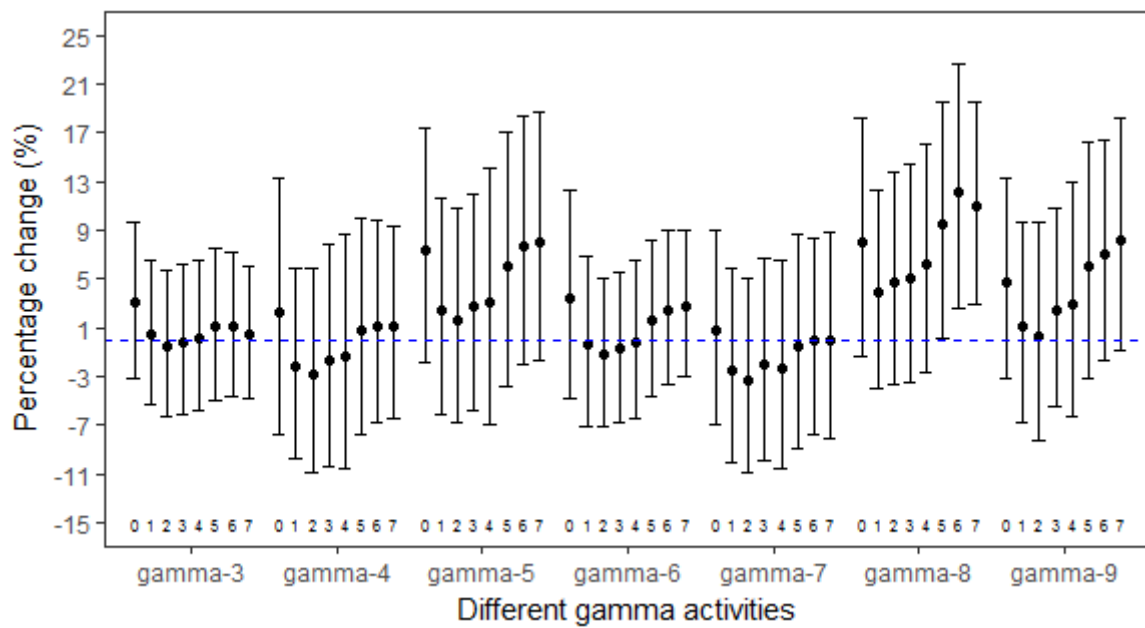

(b) Effect of indoor PM gamma activities for unadjusted models

**Figure S11.** Percentage changes in 8-OHdG with per IQR increase of BC exposures, adjusted for ambient and indoor PM gamma activities for daily moving averages starting with the day of urine collection (day 0) through 7 days before urine collection (day 7).

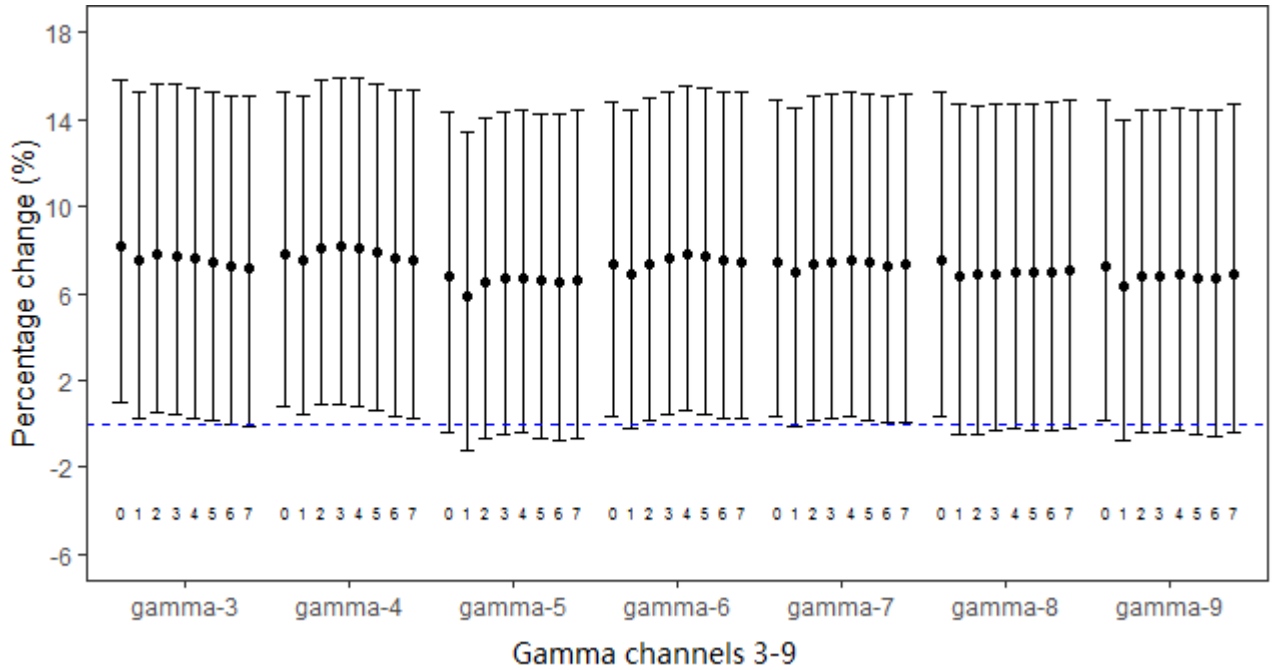

(a) Weekly ambient BC

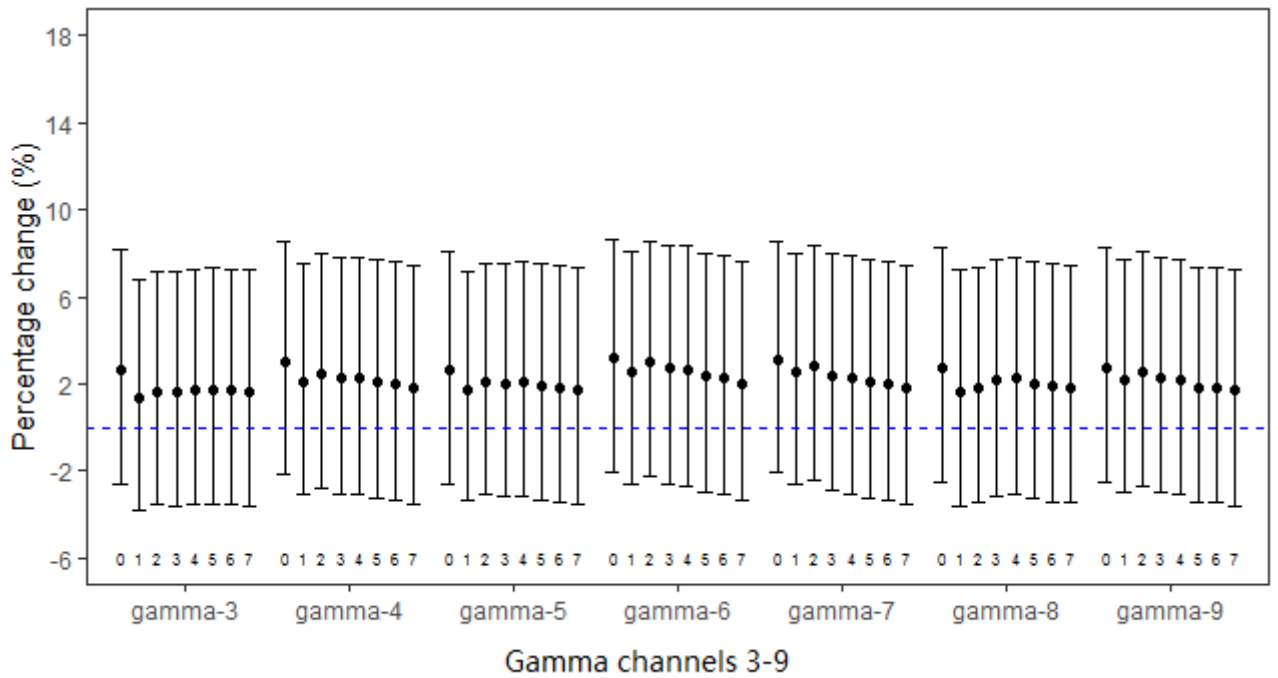

(b) Weekly indoor BC

**Figure S12.** Percentage changes in MDA with per IQR increase of BC exposures, adjusted for ambient and indoor PM gamma activities for daily moving averages starting with the day of urine collection (day 0) through 7 days before urine collection (day 7).

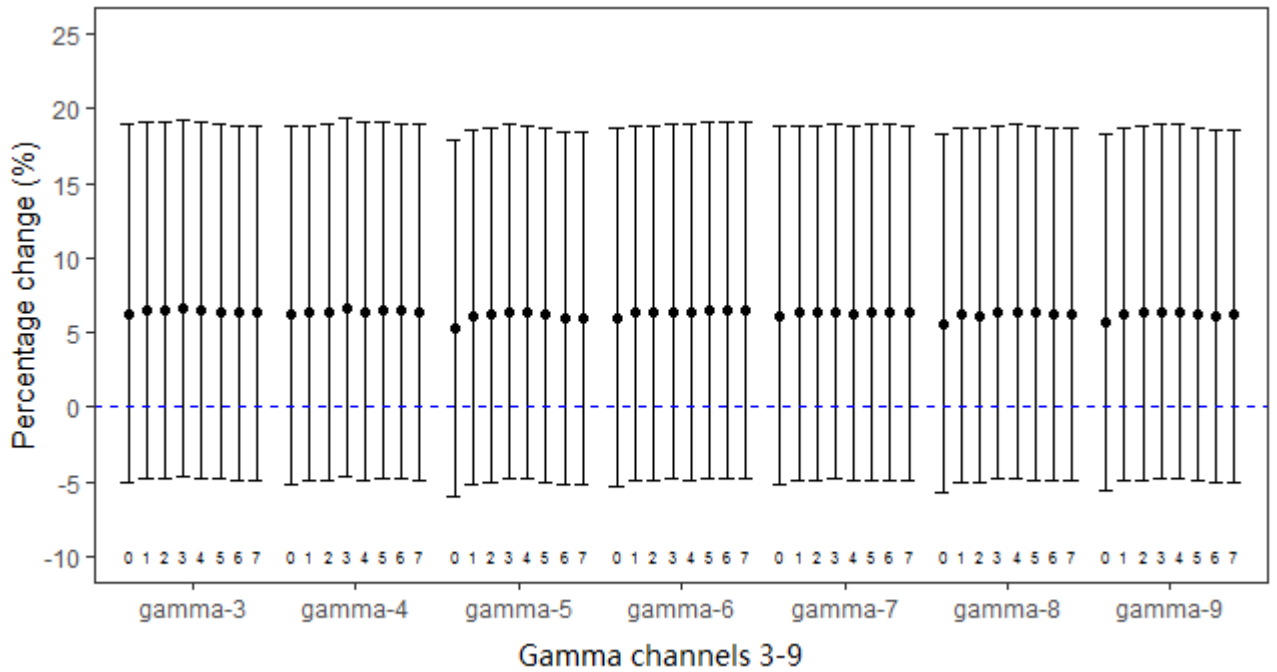

(a) Weekly ambient BC

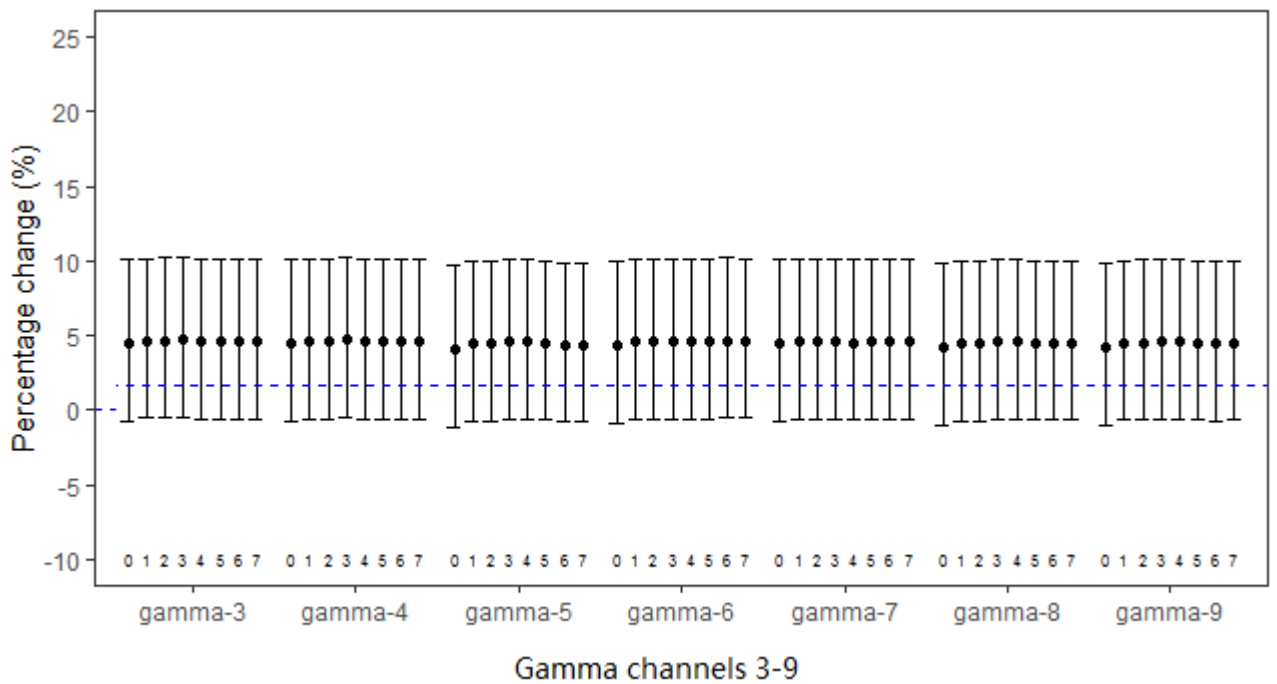

(b) Weekly indoor BC

**Figure S13.** Percentage changes in 8-OHdG with per IQR increase of PM<sub>2.5</sub> exposures, adjusted for ambient and indoor PM gamma activities for daily moving averages starting with the day of urine collection (day 0) through 7 days before urine collection (day 7).

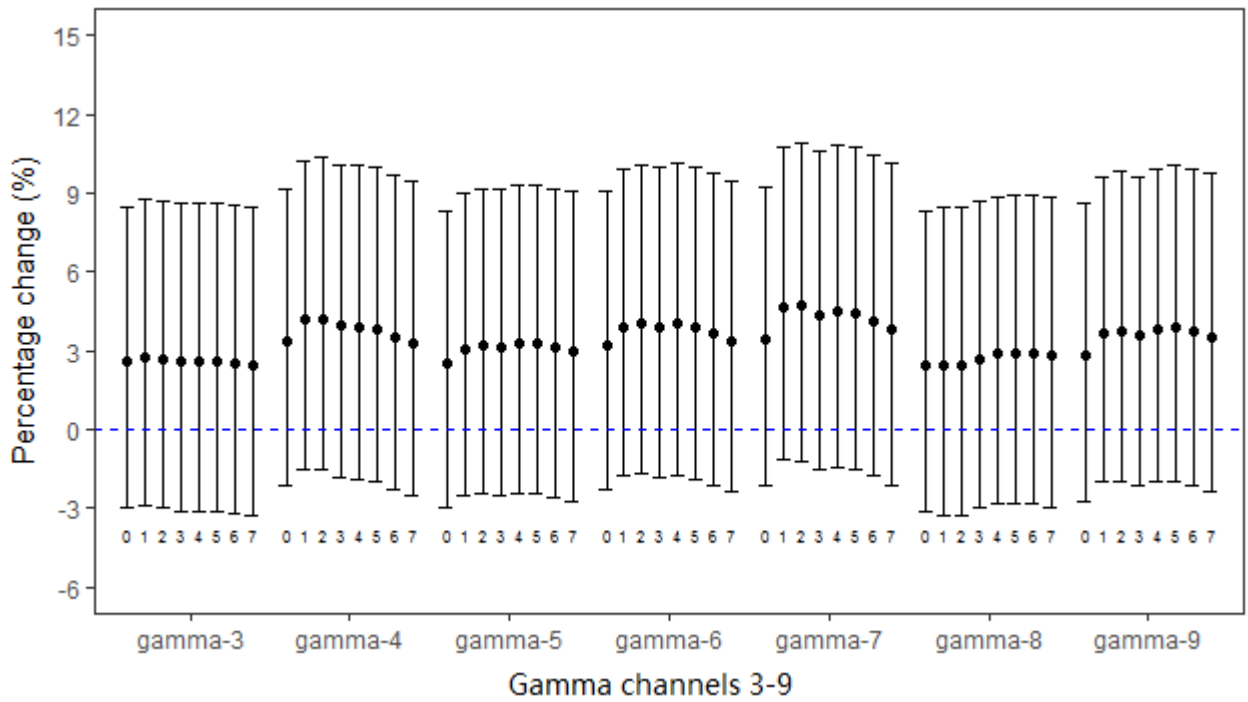

(a) Weekly ambient PM<sub>2.5</sub>

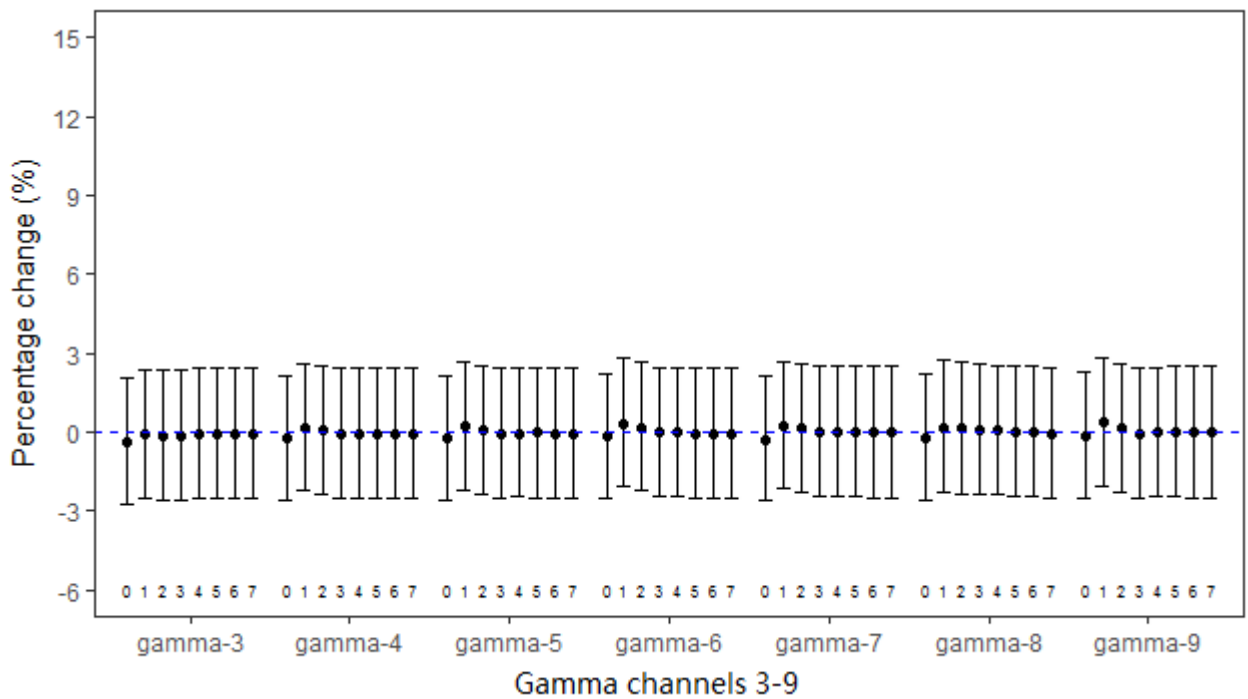

(b) Weekly indoor PM<sub>2.5</sub>

**Figure S14.** Percentage changes in MDA with per IQR increase of  $PM_{2.5}$  exposures, adjusted for ambient and indoor PM gamma activities for daily moving averages starting with the day of urine collection (day 0) through 7 days before urine collection (day 7).

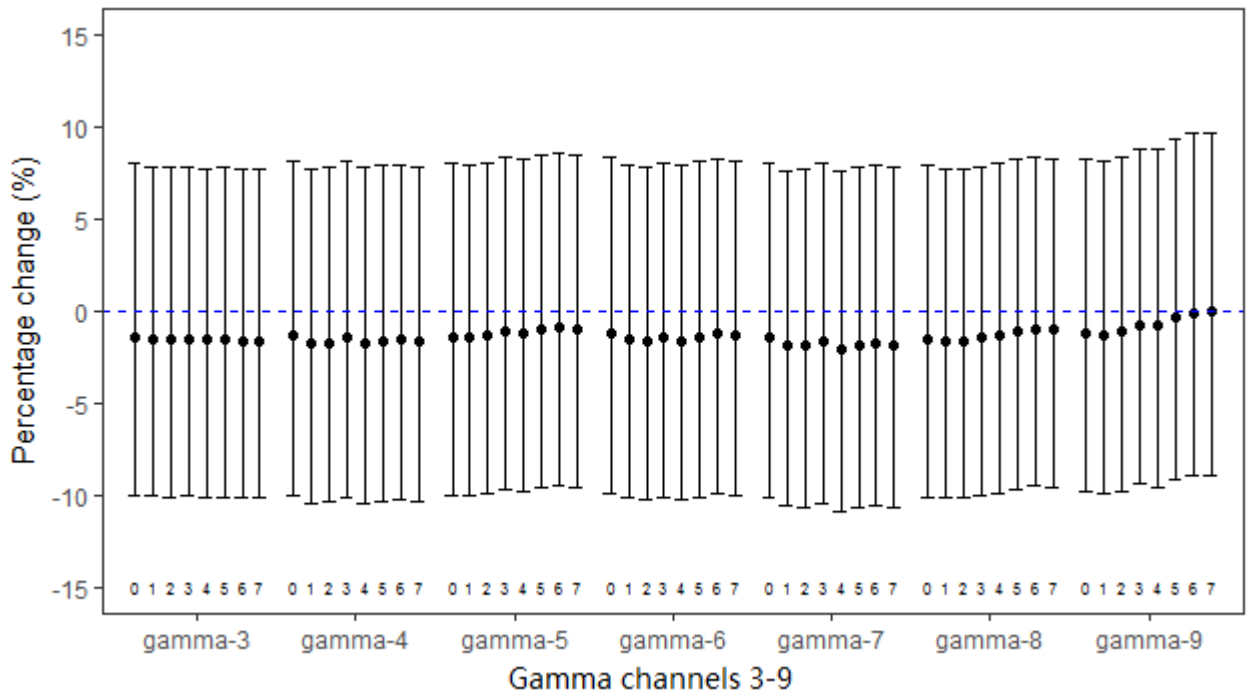

(a) Weekly ambient  $PM_{2.5}$

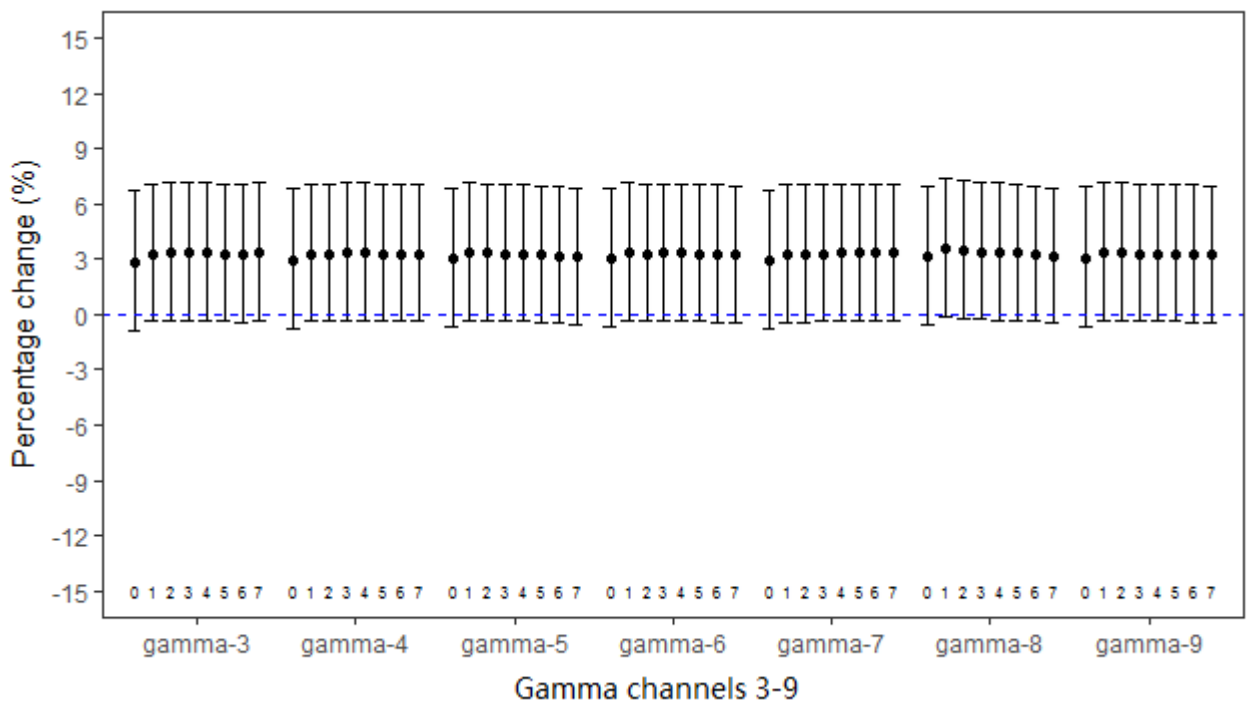

(b) Weekly indoor  $PM_{2.5}$



**Figure S15.** Percentage changes in 8-OHdG with per IQR increase of NO<sub>2</sub> exposures, adjusted for ambient and indoor PM gamma activities for daily moving averages starting with the day of urine collection (day 0) through 7 days before urine collection (day 7).

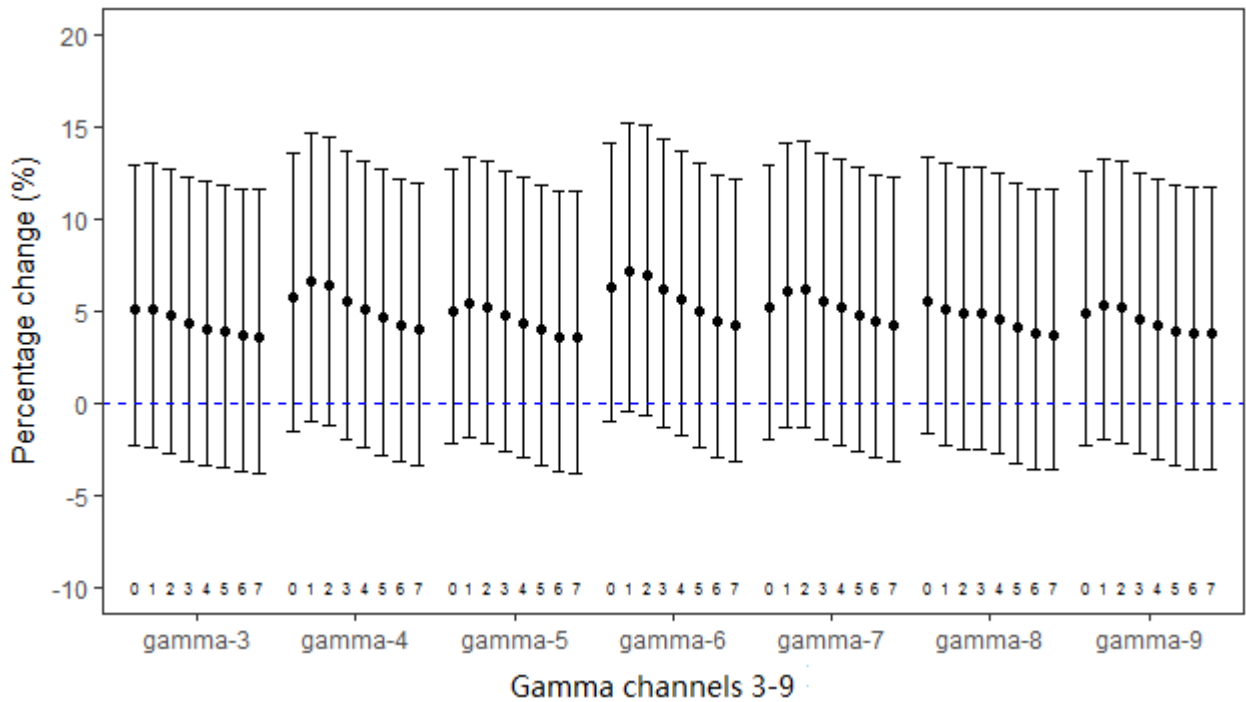

(a) Weekly ambient NO<sub>2</sub>

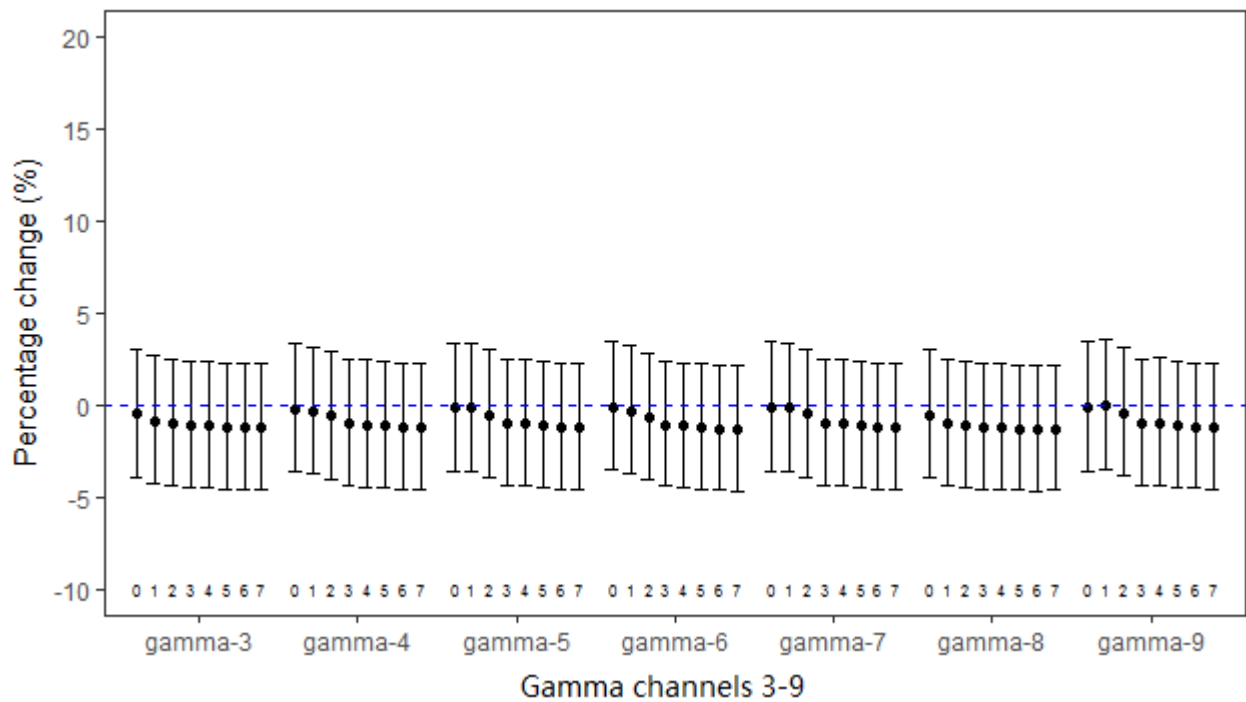

(b) Weekly indoor NO<sub>2</sub>

**Figure S16.** Percentage changes in MDA with per IQR increase of  $\text{NO}_2$  exposures, adjusted for ambient and indoor PM gamma activities for daily moving averages starting with the day of urine collection (day 0) through 7 days before urine collection (day 7).

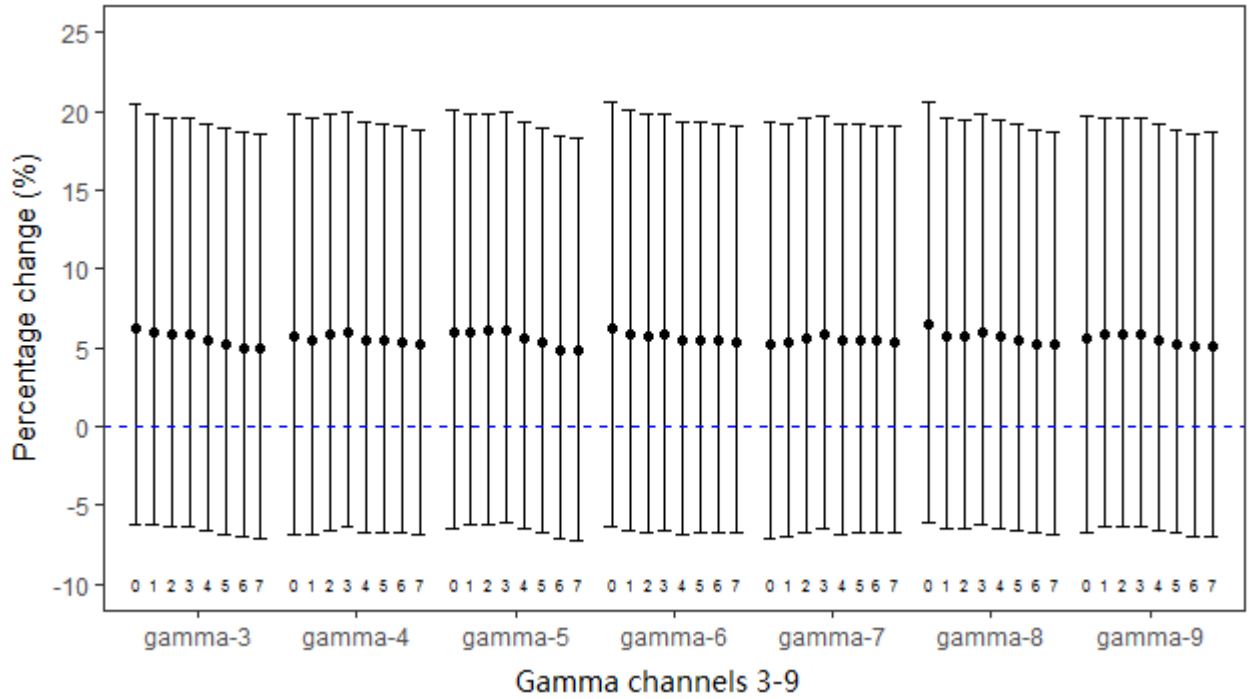

(a) Weekly ambient  $\text{NO}_2$

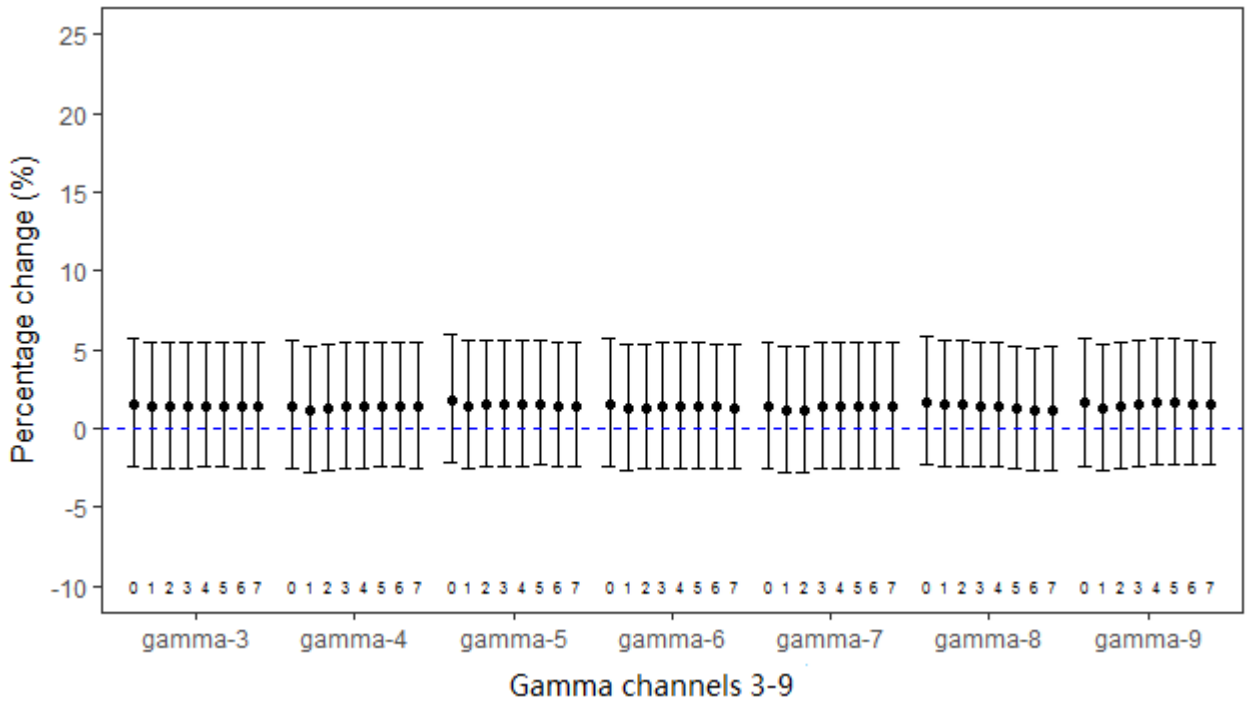

(b) Weekly indoor  $\text{NO}_2$

**Figure S17.** Percentage changes in 8-OHdG with per IQR increase of O<sub>3</sub> exposures, adjusted for ambient PM gamma activities for daily moving averages starting with the day of urine collection (day 0) through 7 days before urine collection (day 7).

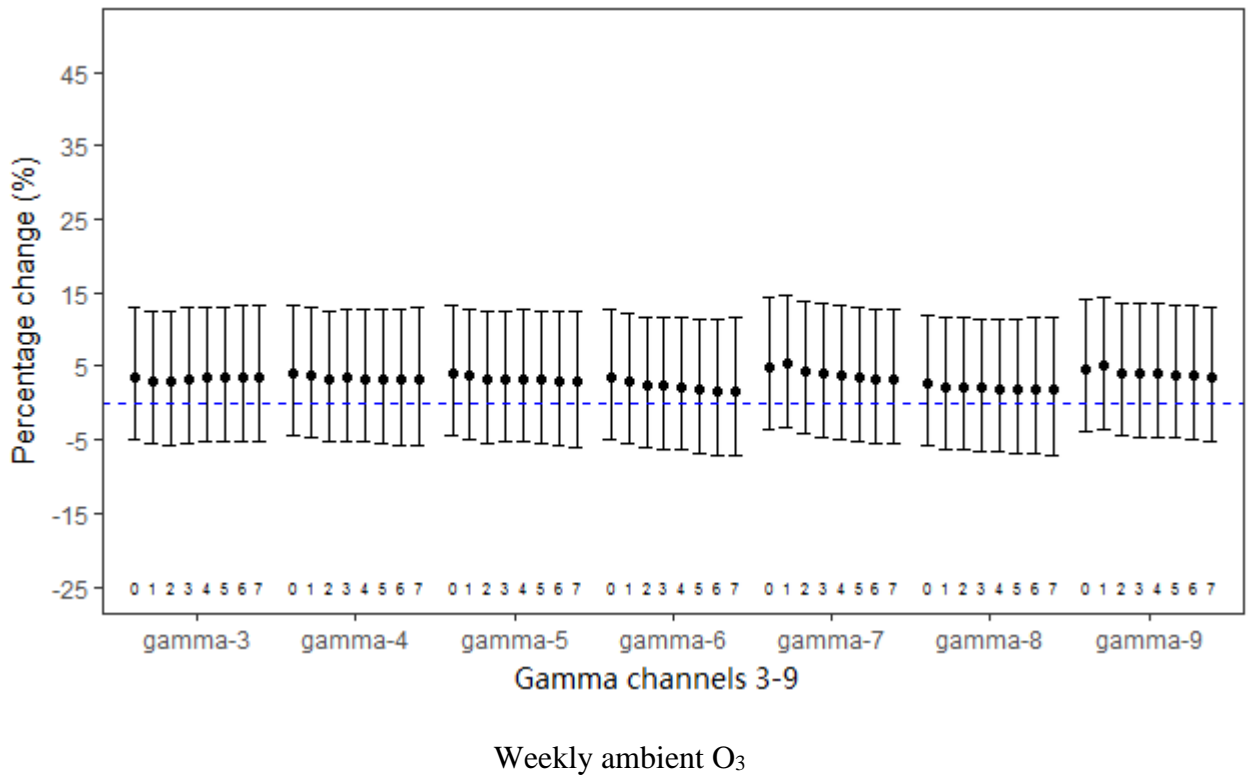

**Figure S18.** Percentage changes in MDA with per IQR increase of O<sub>3</sub> exposures, adjusted for ambient for daily moving averages starting with the day of urine collection (day 0) through 7 days before urine collection (day 7).

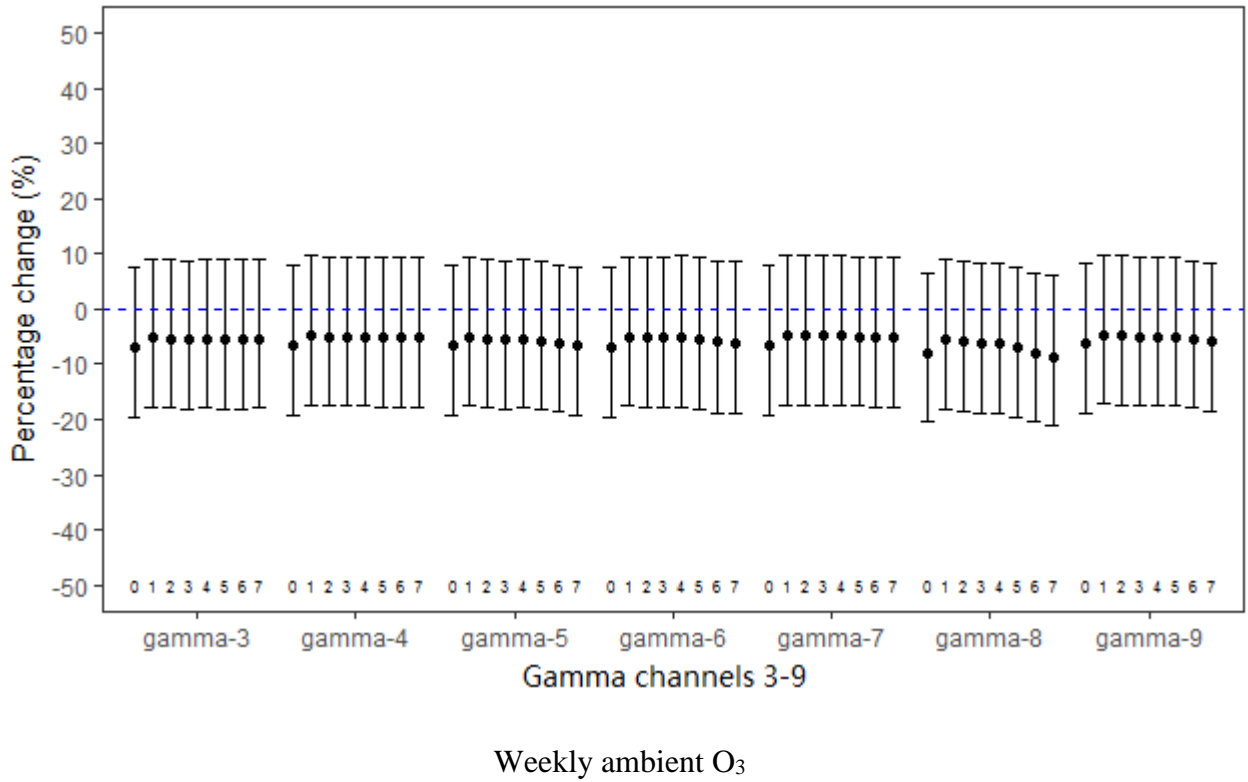

**Table S1.** RadNet gamma energies classification.

| <b>Gamma activity</b> | <b>Energy range (keV)</b>                         |
|-----------------------|---------------------------------------------------|
| <b>Gamma-1</b>        | Reserved by software for instrument stabilization |
| <b>Gamma-2</b>        | 100-200                                           |
| <b>Gamma-3</b>        | 201-400                                           |
| <b>Gamma-4</b>        | 401-600                                           |
| <b>Gamma-5</b>        | 601-800                                           |
| <b>Gamma-6</b>        | 801-1000                                          |
| <b>Gamma-7</b>        | 1001-1400                                         |
| <b>Gamma-8</b>        | 1401-1800                                         |
| <b>Gamma-9</b>        | 1801-2200                                         |

**Table S2.** IQR values of ambient PM gamma activities for different exposure windows

| Ambient PM gamma activity | Exposure window | N   | Median (25-75 <sup>th</sup> percentile) (CPM) | Range (CPM)     | IQR (CPM) |
|---------------------------|-----------------|-----|-----------------------------------------------|-----------------|-----------|
| Gamma-3                   | 0               | 226 | 4.34 (-25.62, 51.11)                          | -195.61 ~265.47 | 76.72     |
|                           | 1               | 231 | 5.49 (-26.96, 41.44)                          | -209.33 ~244.85 | 68.40     |
|                           | 2               | 231 | 4.61 (-21.96, 43.12)                          | -205.63 ~233.49 | 65.09     |
|                           | 3               | 231 | 5.67 (-30.81, 41.92)                          | -187.21 ~213.92 | 72.73     |
|                           | 4               | 231 | 7.19 (-29.01, 42.23)                          | -170.29 ~188.53 | 71.24     |
|                           | 5               | 231 | 3.26 (-25.33, 39.79)                          | -182.71 ~196.75 | 65.12     |
|                           | 6               | 231 | 1.71 (-23.08, 37.87)                          | -189.89 ~197.85 | 60.94     |
| Gamma-4                   | 0               | 226 | -0.01 (-6.10, 9.98)                           | -53.89 ~ 43.36  | 16.08     |
|                           | 1               | 231 | 0.09 (-4.13, 7.28)                            | -61.36 ~ 34.05  | 11.41     |
|                           | 2               | 231 | 0.00 (-3.61, 7.72)                            | -64.56 ~ 34.35  | 11.32     |
|                           | 3               | 231 | -0.11 (-4.96, 8.59)                           | -54.27 ~ 34.69  | 13.56     |
|                           | 4               | 231 | 0.29 (-5.24, 8.45)                            | -47.14 ~ 31.34  | 13.69     |
|                           | 5               | 231 | 0.50 (-4.02, 8.05)                            | -52.07 ~ 26.85  | 12.07     |
|                           | 6               | 231 | 0.45 (-3.61, 7.67)                            | -55.22 ~ 30.88  | 11.27     |
| Gamma-5                   | 0               | 226 | 1.08 (-4.49, 6.56)                            | -37.20 ~ 31.43  | 11.05     |
|                           | 1               | 231 | 0.24 (-3.25, 5.99)                            | -42.19 ~ 36.49  | 9.24      |
|                           | 2               | 231 | 0.05 (-2.71, 5.42)                            | -42.60 ~ 27.25  | 8.14      |
|                           | 3               | 231 | -0.11 (-3.82, 5.53)                           | -36.88 ~ 20.51  | 9.35      |
|                           | 4               | 231 | 0.42 (-3.91, 6.56)                            | -29.01 ~ 19.55  | 10.48     |
|                           | 5               | 231 | 0.63 (-3.51, 6.21)                            | -32.65 ~ 21.83  | 9.72      |
|                           | 6               | 231 | 0.24 (-3.26, 6.07)                            | -34.44 ~ 21.74  | 9.32      |
| Gamma-6                   | 0               | 226 | 0.23 (-1.58, 2.68)                            | -25.26 ~ 14.34  | 4.26      |
|                           | 1               | 231 | 0.14 (-1.24, 2.20)                            | -28.09 ~ 11.75  | 3.44      |
|                           | 2               | 231 | -0.01 (-0.95, 1.96)                           | -29.36 ~ 10.71  | 2.91      |
|                           | 3               | 231 | 0.05 (-1.04, 2.19)                            | -24.02 ~ 10.71  | 3.23      |
|                           | 4               | 231 | 0.19 (-1.15, 2.12)                            | -20.38 ~ 9.65   | 3.27      |
|                           | 5               | 231 | 0.04 (-1.09, 2.06)                            | -22.46 ~ 8.71   | 3.14      |
|                           | 6               | 231 | 0.13 (-1.20, 1.93)                            | -24.04 ~ 7.20   | 3.13      |
| Gamma-7                   | 0               | 226 | -0.04 (-2.41, 3.65)                           | -26.31 ~ 18.62  | 6.05      |
|                           | 1               | 231 | 0.31 (-2.27, 3.42)                            | -30.94 ~ 17.13  | 5.69      |
|                           | 2               | 231 | 0.52 (-2.26, 3.09)                            | -33.03 ~ 12.89  | 5.35      |
|                           | 3               | 231 | 0.65 (-2.47, 3.42)                            | -28.17 ~ 11.45  | 5.89      |
|                           | 4               | 231 | 0.76 (-2.35, 3.41)                            | -23.52 ~ 9.44   | 5.76      |
|                           | 5               | 231 | 0.55 (-2.28, 3.43)                            | -24.71 ~ 10.68  | 5.72      |

|         |         |     |                     |                    |              |
|---------|---------|-----|---------------------|--------------------|--------------|
|         | 6       | 231 | 0.54 (-1.93, 3.26)  | -26.80 ~ 9.95      | 5.19         |
|         | 7       | 231 | 0.49 (-1.80, 3.49)  | -24.64 ~ 9.95      | 5.29         |
| Gamma-8 | 0       | 226 | 0.60 (-2.89, 4.34)  | -26.71 ~ 43.40     | 7.23         |
|         | 1       | 231 | 0.57 (-2.11, 3.61)  | -26.08 ~ 40.79     | 5.72         |
|         | 2       | 231 | 0.64 (-2.18, 3.49)  | -25.30 ~ 38.38     | 5.67         |
|         | 3       | 231 | 0.10 (-2.68, 3.32)  | -20.55 ~ 23.93     | 6.00         |
|         | 4       | 231 | 0.22 (-2.72, 3.13)  | -17.23 ~ 20.37     | 5.85         |
|         | 5       | 231 | 0.45 (-2.50, 3.17)  | -18.81 ~ 22.20     | 5.67         |
|         | 6       | 231 | 0.60 (-2.36, 3.35)  | -19.63 ~ 21.81     | 5.71         |
|         | 7       | 231 | 0.85 (-1.72, 3.08)  | -18.46 ~ 24.11     | 4.81         |
|         | Gamma-9 | 0   | 226                 | 0.08 (-0.43, 0.44) | -3.22 ~ 3.23 |
| 1       |         | 231 | 0.03 (-0.31, 0.48)  | -3.47 ~ 3.73       | 0.79         |
| 2       |         | 231 | -0.01 (-0.31, 0.46) | -3.59 ~ 2.71       | 0.78         |
| 3       |         | 231 | 0.01 (-0.37, 0.41)  | -3.04 ~ 2.10       | 0.79         |
| 4       |         | 231 | 0.04 (-0.37, 0.50)  | -2.60 ~ 1.80       | 0.87         |
| 5       |         | 231 | 0.04 (-0.33, 0.48)  | -2.83 ~ 1.93       | 0.81         |
| 6       |         | 231 | 0.05 (-0.29, 0.45)  | -3.00 ~ 1.80       | 0.74         |
| 7       |         | 231 | 0.10 (-0.30, 0.44)  | -2.79 ~ 1.57       | 0.73         |

Footnotes: 0-7 represent different exposure windows: 0 represents the average indoor PM gamma activity at the phlebotomy day; 1-7 represents the moving averages from 1 to 7 days before phlebotomy respectively.

**Table S3.** IQR values of indoor PM gamma activities for different exposure windows

| <b>Ambient PM gamma activity</b> | <b>Exposure window</b> | <b>N</b> | <b>Median (25-75<sup>th</sup> percentile) (CPM)</b> | <b>Range (CPM)</b> | <b>IQR (CPM)</b> |
|----------------------------------|------------------------|----------|-----------------------------------------------------|--------------------|------------------|
| Gamma-3                          | 0                      | 217      | -0.03 (-22.22, 32.45)                               | -151.06 ~ 205.23   | 54.67            |
|                                  | 1                      | 222      | 0.37 (-22.31, 27.40)                                | -170.32 ~ 237.26   | 49.71            |
|                                  | 2                      | 222      | -0.06 (-19.27, 25.97)                               | -170.32 ~ 165.89   | 45.24            |
|                                  | 3                      | 222      | -0.14 (-24.44, 23.43)                               | -170.32 ~ 198.49   | 47.87            |
|                                  | 4                      | 222      | -0.17 (-23.44, 21.76)                               | -170.32 ~ 212.42   | 45.20            |
|                                  | 5                      | 222      | -0.13 (-21.55, 21.45)                               | -192.54 ~ 203.84   | 43.00            |
|                                  | 6                      | 222      | -2.10 (-20.36, 20.40)                               | -197.32 ~ 222.93   | 40.75            |
|                                  | 7                      | 222      | -2.23 (-18.96, 17.70)                               | -170.32 ~ 223.02   | 36.66            |
| Gamma-4                          | 0                      | 217      | -0.26 (-4.30, 5.51)                                 | -38.41 ~ 38.83     | 16.08            |
|                                  | 1                      | 222      | -0.16 (-3.94, 4.58)                                 | -37.72 ~ 38.83     | 11.41            |
|                                  | 2                      | 222      | -0.17 (-3.84, 4.85)                                 | -36.22 ~ 38.83     | 11.32            |
|                                  | 3                      | 222      | -0.51 (-4.18, 5.38)                                 | -38.50 ~ 28.37     | 13.56            |
|                                  | 4                      | 222      | -0.39 (-4.52, 4.93)                                 | -39.56 ~ 32.05     | 13.69            |
|                                  | 5                      | 222      | -0.40 (-3.80, 4.74)                                 | -46.06 ~ 30.25     | 12.07            |
|                                  | 6                      | 222      | -0.63 (-3.65, 4.39)                                 | -48.73 ~ 34.79     | 11.27            |
|                                  | 7                      | 222      | -0.28 (-3.42, 3.96)                                 | -42.08 ~ 34.18     | 10.48            |
| Gamma-5                          | 0                      | 217      | 0.00 (-3.25, 3.87)                                  | -24.36 ~ 29.12     | 11.05            |
|                                  | 1                      | 222      | -0.34 (-2.75, 3.39)                                 | -23.68 ~ 24.68     | 9.24             |
|                                  | 2                      | 222      | -0.11 (-2.72, 3.47)                                 | -23.90 ~ 24.68     | 8.14             |
|                                  | 3                      | 222      | -0.22 (-3.47, 3.45)                                 | -22.05 ~ 25.37     | 9.35             |
|                                  | 4                      | 222      | -0.01 (-3.22, 3.36)                                 | -24.34 ~ 18.43     | 10.48            |
|                                  | 5                      | 222      | -0.01 (-2.94, 3.56)                                 | -30.98 ~ 17.79     | 9.72             |
|                                  | 6                      | 222      | -0.10 (-2.72, 3.59)                                 | -31.79 ~ 16.84     | 9.32             |
|                                  | 7                      | 222      | -0.02 (-2.55, 3.31)                                 | -27.18 ~ 16.53     | 9.03             |
| Gamma-6                          | 0                      | 217      | 0.01 (-1.10, 1.62)                                  | -15.10 ~ 15.71     | 4.26             |
|                                  | 1                      | 222      | -0.04 (-1.00, 1.16)                                 | -16.11 ~ 15.71     | 3.44             |
|                                  | 2                      | 222      | -0.05 (-0.85, 1.17)                                 | -16.48 ~ 15.71     | 2.91             |
|                                  | 3                      | 222      | -0.07 (-0.89, 1.39)                                 | -15.70 ~ 8.21      | 3.23             |
|                                  | 4                      | 222      | -0.06 (-0.88, 1.46)                                 | -17.08 ~ 5.91      | 3.27             |
|                                  | 5                      | 222      | -0.01 (-0.88, 1.34)                                 | -18.85 ~ 5.26      | 3.14             |
|                                  | 6                      | 222      | -0.01 (-0.87, 1.26)                                 | -20.17 ~ 4.87      | 3.13             |
|                                  | 7                      | 222      | 0.00 (-0.85, 1.19)                                  | -18.39 ~ 4.96      | 2.92             |
| Gamma-7                          | 0                      | 217      | -0.19 (-2.13, 2.16)                                 | -16.08 ~ 17.26     | 6.05             |
|                                  | 1                      | 222      | -0.01 (-1.81, 2.08)                                 | -18.11 ~ 15.80     | 5.69             |
|                                  | 2                      | 222      | 0.12 (-1.74, 2.03)                                  | -18.54 ~ 15.80     | 5.35             |
|                                  | 3                      | 222      | 0.22 (-2.01, 2.25)                                  | -17.25 ~ 13.72     | 5.89             |
|                                  | 4                      | 222      | 0.22 (-1.94, 2.22)                                  | -18.46 ~ 12.06     | 5.76             |
|                                  | 5                      | 222      | 0.23 (-1.64, 2.22)                                  | -20.73 ~ 11.75     | 5.72             |



|         |         |     |                    |                    |              |
|---------|---------|-----|--------------------|--------------------|--------------|
|         | 6       | 222 | 0.16 (-1.54, 2.01) | -22.49 ~ 11.63     | 5.19         |
|         | 7       | 222 | 0.14 (-1.48, 1.90) | -20.68 ~ 11.71     | 5.29         |
| Gamma-8 | 0       | 217 | 0.37 (-1.85, 3.39) | -21.99 ~ 29.76     | 7.23         |
|         | 1       | 222 | 0.10 (-1.61, 3.03) | -23.18 ~ 31.91     | 5.72         |
|         | 2       | 222 | 0.11 (-1.63, 2.36) | -24.05 ~ 31.27     | 5.67         |
|         | 3       | 222 | 0.00 (-2.10, 2.17) | -23.65 ~ 30.13     | 6.00         |
|         | 4       | 222 | 0.03 (-2.03, 1.97) | -19.83 ~ 22.61     | 5.85         |
|         | 5       | 222 | 0.04 (-1.86, 1.96) | -19.53 ~ 21.70     | 5.67         |
|         | 6       | 222 | 0.05 (-1.58, 2.03) | -19.50 ~ 22.57     | 5.71         |
|         | 7       | 222 | 0.04 (-1.57, 1.96) | -18.83 ~ 22.73     | 4.81         |
|         | Gamma-9 | 0   | 217                | 0.00 (-0.31, 0.30) | -2.01 ~ 2.99 |
| 1       |         | 222 | 0.00 (-0.23, 0.27) | -1.95 ~ 2.29       | 0.79         |
| 2       |         | 222 | 0.00 (-0.20, 0.28) | -2.02 ~ 1.79       | 0.78         |
| 3       |         | 222 | 0.00 (-0.27, 0.29) | -2.01 ~ 2.23       | 0.79         |
| 4       |         | 222 | 0.00 (-0.24, 0.30) | -2.18 ~ 1.86       | 0.87         |
| 5       |         | 222 | 0.00 (-0.22, 0.30) | -2.37 ~ 1.53       | 0.81         |
| 6       |         | 222 | 0.00 (-0.22, 0.30) | -2.53 ~ 1.30       | 0.74         |
| 7       |         | 222 | 0.02 (-0.20, 0.28) | -2.34 ~ 1.16       | 0.73         |

Footnotes: 0-7 represent different exposure windows: 0 represents the average indoor PM gamma activity at the phlebotomy day; 1-7 represents the moving averages from 1 to 7 days before phlebotomy respectively.

**Table S4.** Percent increases of 8-OHdG with per IQR increases of ambient and indoor PM gamma activities with different exposure windows

| Ambient PM gamma activity | Exposure window | (a) Effect of ambient PM gamma |                                           |              |
|---------------------------|-----------------|--------------------------------|-------------------------------------------|--------------|
|                           |                 | N                              | Percentage change per IQR (95% CI)<br>(%) | <i>p</i>     |
| <b>Gamma-3</b>            | 0               | 226                            | 3.41 (-0.25, 7.21)                        | 0.070        |
|                           | 1               | <b>231</b>                     | <b>4.07 (0.57, 7.69)</b>                  | <b>0.023</b> |
|                           | 2               | 231                            | 3.57 (-0.06, 7.32)                        | 0.056        |
|                           | 3               | 231                            | 3.55 (-0.67, 7.96)                        | 0.102        |
|                           | 4               | 231                            | 3.06 (-1.27, 7.58)                        | 0.171        |
|                           | 5               | 231                            | 2.86 (-1.25, 7.15)                        | 0.178        |
|                           | 6               | 231                            | 2.28 (-1.61, 6.33)                        | 0.255        |
|                           | 7               | 231                            | 1.70 (-1.90, 5.44)                        | 0.36         |
| <b>Gamma-4</b>            | 0               | <b>226</b>                     | <b>5.92 (1.69, 10.32)</b>                 | <b>0.006</b> |
|                           | 1               | <b>231</b>                     | <b>5.38 (2.07, 8.80)</b>                  | <b>0.002</b> |
|                           | 2               | <b>231</b>                     | <b>5.16 (1.65, 8.78)</b>                  | <b>0.004</b> |
|                           | 3               | <b>231</b>                     | <b>5.64 (1.27, 10.19)</b>                 | <b>0.012</b> |
|                           | 4               | <b>231</b>                     | <b>5.43 (0.81, 10.27)</b>                 | <b>0.022</b> |
|                           | 5               | <b>231</b>                     | <b>4.64 (0.48, 8.98)</b>                  | <b>0.030</b> |
|                           | 6               | 231                            | 3.78 (-0.14, 7.86)                        | 0.061        |
|                           | 7               | 231                            | 3.00 (-0.72, 6.86)                        | 0.117        |
| <b>Gamma-5</b>            | 0               | <b>226</b>                     | <b>4.31 (0.67, 8.08)</b>                  | <b>0.021</b> |
|                           | 1               | <b>231</b>                     | <b>5.65 (2.08, 9.34)</b>                  | <b>0.002</b> |
|                           | 2               | <b>231</b>                     | <b>4.91 (1.44, 8.50)</b>                  | <b>0.006</b> |
|                           | 3               | <b>231</b>                     | <b>5.23 (1.13, 9.49)</b>                  | <b>0.013</b> |
|                           | 4               | <b>231</b>                     | <b>5.81 (0.98, 10.88)</b>                 | <b>0.019</b> |
|                           | 5               | <b>231</b>                     | <b>5.00 (0.35, 9.87)</b>                  | <b>0.037</b> |
|                           | 6               | 231                            | 4.08 (-0.53, 8.90)                        | 0.086        |
|                           | 7               | 231                            | 3.35 (-1.24, 8.15)                        | 0.157        |
| <b>Gamma-6</b>            | 0               | <b>226</b>                     | <b>4.56 (1.30, 7.92)</b>                  | <b>0.007</b> |
|                           | 1               | <b>231</b>                     | <b>4.57 (1.74, 7.47)</b>                  | <b>0.002</b> |
|                           | 2               | <b>231</b>                     | <b>3.75 (1.32, 6.25)</b>                  | <b>0.003</b> |
|                           | 3               | <b>231</b>                     | <b>4.04 (1.20, 6.96)</b>                  | <b>0.006</b> |
|                           | 4               | <b>231</b>                     | <b>4.20 (1.16, 7.32)</b>                  | <b>0.007</b> |
|                           | 5               | <b>231</b>                     | <b>3.81 (0.84, 6.86)</b>                  | <b>0.013</b> |
|                           | 6               | <b>231</b>                     | <b>3.47 (0.51, 6.52)</b>                  | <b>0.023</b> |
|                           | 7               | <b>231</b>                     | <b>2.91 (0.10, 5.80)</b>                  | <b>0.044</b> |
| <b>Gamma-7</b>            | 0               | <b>226</b>                     | <b>4.09 (0.96, 7.31)</b>                  | <b>0.011</b> |
|                           | 1               | <b>231</b>                     | <b>5.12 (1.82, 8.51)</b>                  | <b>0.003</b> |
|                           | 2               | <b>231</b>                     | <b>4.44 (1.16, 7.83)</b>                  | <b>0.008</b> |
|                           | 3               | <b>231</b>                     | <b>4.53 (0.69, 8.51)</b>                  | <b>0.022</b> |

|                |   |            |                          |              |
|----------------|---|------------|--------------------------|--------------|
|                | 4 | <b>231</b> | <b>4.55 (0.50, 8.76)</b> | <b>0.029</b> |
|                | 5 | <b>231</b> | <b>4.50 (0.33, 8.84)</b> | <b>0.036</b> |
|                | 6 | 231        | 3.72 (-0.13, 7.73)       | 0.060        |
|                | 7 | 231        | 3.16 (-0.90, 7.39)       | 0.131        |
| <b>Gamma-8</b> | 0 | 226        | 2.43 (-0.89, 5.85)       | 0.155        |
|                | 1 | 231        | 2.09 (-0.79, 5.05)       | 0.159        |
|                | 2 | 231        | 2.64 (-0.41, 5.78)       | 0.092        |
|                | 3 | <b>231</b> | <b>3.71 (0.09, 7.45)</b> | <b>0.046</b> |
|                | 4 | <b>231</b> | <b>4.38 (0.49, 8.41)</b> | <b>0.028</b> |
|                | 5 | 231        | 3.84 (-0.11, 7.94)       | 0.059        |
|                | 6 | 231        | 3.42 (-0.63, 7.64)       | 0.101        |
|                | 7 | 231        | 2.63 (-0.78, 6.16)       | 0.134        |
| <b>Gamma-9</b> | 0 | <b>226</b> | <b>3.34 (0.16, 6.62)</b> | <b>0.041</b> |
|                | 1 | <b>231</b> | <b>4.99 (1.56, 8.53)</b> | <b>0.005</b> |
|                | 2 | <b>231</b> | <b>4.78 (1.06, 8.63)</b> | <b>0.012</b> |
|                | 3 | <b>231</b> | <b>4.61 (0.70, 8.68)</b> | <b>0.022</b> |
|                | 4 | <b>231</b> | <b>5.15 (0.54, 9.98)</b> | <b>0.030</b> |
|                | 5 | <b>231</b> | <b>4.59 (0.08, 9.31)</b> | <b>0.048</b> |
|                | 6 | 231        | 3.52 (-0.73, 7.96)       | 0.108        |
|                | 7 | 231        | 2.95 (-1.52, 7.62)       | 0.201        |

| Indoor PM gamma activity | Exposure window | (b) Effect of indoor PM gamma |                                          |              |
|--------------------------|-----------------|-------------------------------|------------------------------------------|--------------|
|                          |                 | N                             | Percentage change per IQR (95%CI)<br>(%) | <i>p</i>     |
| <b>Gamma-3</b>           | 0               | 216                           | 3.24 (-0.67, 7.31)                       | 0.108        |
|                          | 1               | 221                           | 3.69 (-0.14, 7.67)                       | 0.061        |
|                          | 2               | 221                           | 2.80 (-1.07, 6.82)                       | 0.161        |
|                          | 3               | 221                           | 1.52 (-2.41, 5.61)                       | 0.454        |
|                          | 4               | 221                           | 0.97 (-2.87, 4.96)                       | 0.627        |
|                          | 5               | 221                           | 0.80 (-2.98, 4.72)                       | 0.684        |
|                          | 6               | 221                           | 0.46 (-3.10, 4.14)                       | 0.805        |
|                          | 7               | 221                           | 0.19 (-3.04, 3.51)                       | 0.911        |
| <b>Gamma-4</b>           | 0               | <b>216</b>                    | <b>8.58 (1.96, 15.64)</b>                | <b>0.011</b> |
|                          | 1               | <b>221</b>                    | <b>7.24 (1.89, 12.87)</b>                | <b>0.008</b> |
|                          | 2               | <b>221</b>                    | <b>6.56 (0.81, 12.63)</b>                | <b>0.026</b> |
|                          | 3               | 221                           | 4.27 (-1.82, 10.74)                      | 0.175        |
|                          | 4               | 221                           | 3.65 (-2.72, 10.43)                      | 0.270        |
|                          | 5               | 221                           | 2.71 (-2.96, 8.71)                       | 0.357        |
|                          | 6               | 221                           | 1.92 (-3.28, 7.41)                       | 0.478        |
|                          | 7               | 221                           | 1.27 (-3.64, 6.42)                       | 0.620        |
| <b>Gamma-5</b>           | 0               | <b>216</b>                    | <b>7.07 (1.32, 13.14)</b>                | <b>0.017</b> |
|                          | 1               | <b>221</b>                    | <b>8.87 (2.98, 15.11)</b>                | <b>0.003</b> |

|                |   |            |                           |              |
|----------------|---|------------|---------------------------|--------------|
|                | 2 | <b>221</b> | <b>7.28 (1.52, 13.37)</b> | <b>0.014</b> |
|                | 3 | 221        | 4.55 (-1.06, 10.48)       | 0.116        |
|                | 4 | 221        | 4.86 (-1.78, 11.95)       | 0.157        |
|                | 5 | 221        | 3.49 (-2.83, 10.22)       | 0.288        |
|                | 6 | 221        | 2.41 (-3.62, 8.82)        | 0.443        |
|                | 7 | 221        | 1.75 (-4.24, 8.11)        | 0.576        |
| <b>Gamma-6</b> | 0 | <b>216</b> | <b>7.75 (2.46, 13.32)</b> | <b>0.004</b> |
|                | 1 | <b>221</b> | <b>7.56 (2.77, 12.58)</b> | <b>0.002</b> |
|                | 2 | <b>221</b> | <b>5.99 (1.79, 10.36)</b> | <b>0.005</b> |
|                | 3 | <b>221</b> | <b>4.22 (0.07, 8.53)</b>  | <b>0.048</b> |
|                | 4 | 221        | 4.07 (-0.34, 8.68)        | 0.073        |
|                | 5 | 221        | 3.19 (-1.01, 7.57)        | 0.14         |
|                | 6 | 221        | 2.79 (-1.29, 7.05)        | 0.185        |
|                | 7 | 221        | 2.26 (-1.61, 6.29)        | 0.257        |
| <b>Gamma-7</b> | 0 | <b>216</b> | <b>6.17 (1.34, 11.23)</b> | <b>0.013</b> |
|                | 1 | <b>221</b> | <b>6.82 (1.59, 12.32)</b> | <b>0.011</b> |
|                | 2 | <b>221</b> | <b>5.36 (0.21, 10.76)</b> | <b>0.043</b> |
|                | 3 | 221        | 3.18 (-2.08, 8.71)        | 0.243        |
|                | 4 | 221        | 3.13 (-2.52, 9.11)        | 0.285        |
|                | 5 | 221        | 2.77 (-3.01, 8.90)        | 0.356        |
|                | 6 | 221        | 2.19 (-3.08, 7.74)        | 0.424        |
|                | 7 | 221        | 1.36 (-4.13, 7.16)        | 0.636        |
| <b>Gamma-8</b> | 0 | 216        | 4.06 (-0.87, 9.24)        | 0.110        |
|                | 1 | 221        | 3.41 (-0.88, 7.88)        | 0.123        |
|                | 2 | 221        | 3.71 (-0.70, 8.32)        | 0.103        |
|                | 3 | 221        | 4.33 (-0.40, 9.28)        | 0.076        |
|                | 4 | 221        | 4.88 (-0.29, 10.31)       | 0.067        |
|                | 5 | 221        | 3.91 (-1.28, 9.37)        | 0.144        |
|                | 6 | 221        | 3.28 (-1.95, 8.78)        | 0.225        |
|                | 7 | 221        | 2.56 (-1.83, 7.14)        | 0.260        |
| <b>Gamma-9</b> | 0 | 216        | <b>5.40 (0.39, 10.65)</b> | <b>0.036</b> |
|                | 1 | <b>221</b> | <b>7.60 (1.99, 13.53)</b> | <b>0.008</b> |
|                | 2 | <b>221</b> | <b>6.80 (0.82, 13.14)</b> | <b>0.027</b> |
|                | 3 | 221        | 4.05 (-1.14, 9.52)        | 0.131        |
|                | 4 | 221        | 4.58 (-1.61, 11.15)       | 0.152        |
|                | 5 | 221        | 3.41 (-2.61, 9.81)        | 0.274        |
|                | 6 | 221        | 2.50 (-3.05, 8.38)        | 0.386        |
|                | 7 | 221        | 1.80 (-3.99, 7.95)        | 0.551        |

Footnotes: 0-7 represent different exposure windows: 0 represents the average indoor PM gamma activity at the urine collection day; 1-7 represents the moving averages from 1 to 7 days before urine collection. *P* is the *p*-value, which represents the significant level of indoor PM

gamma effect:  $P < 0.05$  represents significant, and  $0.05 \leq P < 0.1$  represents marginally significant.

**Table S5.** Percent increases of MDA with per IQR increases of ambient and indoor PM gamma activities with different exposure windows

| Ambient PM gamma activity | Exposure window | (a) Effect of ambient PM gamma |                                          |          |
|---------------------------|-----------------|--------------------------------|------------------------------------------|----------|
|                           |                 | N                              | Percentage change per IQR (95%CI)<br>(%) | <i>p</i> |
| <b>Gamma-3</b>            | 0               | 226                            | 3.24 (-2.82, 9.67)                       | 0.303    |
|                           | 1               | 231                            | 1.60 (-3.88, 7.40)                       | 0.575    |
|                           | 2               | 231                            | 1.22 (-4.46, 7.23)                       | 0.682    |
|                           | 3               | 231                            | 1.51 (-4.65, 8.07)                       | 0.639    |
|                           | 4               | 231                            | 0.94 (-5.42, 7.74)                       | 0.777    |
|                           | 5               | 231                            | 0.98 (-5.15, 7.49)                       | 0.761    |
|                           | 6               | 231                            | 0.69 (-5.09, 6.83)                       | 0.820    |
|                           | 7               | 231                            | -0.12 (-5.44, 5.51)                      | 0.967    |
| <b>Gamma-4</b>            | 0               | 226                            | 1.65 (-5.25, 9.05)                       | 0.648    |
|                           | 1               | 231                            | -0.11 (-5.24, 5.30)                      | 0.967    |
|                           | 2               | 231                            | 0.40 (-5.04, 6.16)                       | 0.888    |
|                           | 3               | 231                            | 1.13 (-4.93, 7.57)                       | 0.722    |
|                           | 4               | 231                            | 0.31 (-6.12, 7.17)                       | 0.928    |
|                           | 5               | 231                            | 0.63 (-5.25, 6.87)                       | 0.839    |
|                           | 6               | 231                            | 0.61 (-4.96, 6.51)                       | 0.833    |
|                           | 7               | 231                            | 0.20 (-5.08, 5.78)                       | 0.941    |
| <b>Gamma-5</b>            | 0               | 226                            | 3.75 (-2.30, 10.19)                      | 0.231    |
|                           | 1               | 231                            | 1.68 (-3.88, 7.57)                       | 0.562    |
|                           | 2               | 231                            | 2.13 (-3.37, 7.94)                       | 0.457    |
|                           | 3               | 231                            | 2.90 (-2.84, 8.98)                       | 0.330    |
|                           | 4               | 231                            | 2.26 (-4.46, 9.47)                       | 0.52     |
|                           | 5               | 231                            | 3.28 (-3.36, 10.38)                      | 0.342    |
|                           | 6               | 231                            | 4.05 (-2.58, 11.12)                      | 0.239    |
|                           | 7               | 231                            | 3.65 (-2.95, 10.69)                      | 0.287    |
| <b>Gamma-6</b>            | 0               | 226                            | 2.05 (-3.31, 7.70)                       | 0.463    |
|                           | 1               | 231                            | 0.43 (-3.96, 5.03)                       | 0.850    |
|                           | 2               | 231                            | 0.25 (-3.58, 4.24)                       | 0.899    |
|                           | 3               | 231                            | 0.37 (-3.59, 4.49)                       | 0.859    |
|                           | 4               | 231                            | 0.12 (-4.12, 4.54)                       | 0.957    |
|                           | 5               | 231                            | 0.69 (-3.49, 5.05)                       | 0.752    |
|                           | 6               | 231                            | 1.07 (-3.11, 5.44)                       | 0.622    |
|                           | 7               | 231                            | 0.96 (-3.03, 5.12)                       | 0.642    |
| <b>Gamma-7</b>            | 0               | 226                            | 0.50 (-4.65, 5.92)                       | 0.854    |
|                           | 1               | 231                            | -0.37 (-5.47, 5.00)                      | 0.890    |
|                           | 2               | 231                            | -0.16 (-5.26, 5.21)                      | 0.952    |
|                           | 3               | 231                            | 0.53 (-4.88, 6.24)                       | 0.852    |

|                |   |     |                     |       |
|----------------|---|-----|---------------------|-------|
|                | 4 | 231 | -0.45 (-6.11, 5.55) | 0.880 |
|                | 5 | 231 | 0.10 (-5.73, 6.28)  | 0.975 |
|                | 6 | 231 | 0.27 (-5.14, 5.99)  | 0.924 |
|                | 7 | 231 | 0.05 (-5.64, 6.08)  | 0.987 |
| <b>Gamma-8</b> | 0 | 226 | 2.86 (-2.66, 8.70)  | 0.317 |
|                | 1 | 231 | 0.88 (-3.66, 5.63)  | 0.711 |
|                | 2 | 231 | 1.64 (-3.22, 6.73)  | 0.517 |
|                | 3 | 231 | 2.39 (-2.92, 8.00)  | 0.386 |
|                | 4 | 231 | 2.78 (-2.99, 8.88)  | 0.354 |
|                | 5 | 231 | 4.20 (-1.82, 10.59) | 0.177 |
|                | 6 | 231 | 5.51 (-0.76, 12.18) | 0.088 |
|                | 7 | 231 | 4.66 (-0.61, 10.22) | 0.086 |
| <b>Gamma-9</b> | 0 | 226 | 2.77 (-2.51, 8.33)  | 0.311 |
|                | 1 | 231 | 1.58 (-3.74, 7.18)  | 0.569 |
|                | 2 | 231 | 1.95 (-3.85, 8.10)  | 0.519 |
|                | 3 | 231 | 2.86 (-2.55, 8.57)  | 0.307 |
|                | 4 | 231 | 2.40 (-3.92, 9.14)  | 0.466 |
|                | 5 | 231 | 3.76 (-2.51, 10.43) | 0.247 |
|                | 6 | 231 | 3.98 (-1.97, 10.29) | 0.196 |
|                | 7 | 231 | 4.21 (-2.06, 10.88) | 0.195 |

| Indoor PM gamma activity | Exposure window | (b) Effect of indoor PM gamma |                                        |          |
|--------------------------|-----------------|-------------------------------|----------------------------------------|----------|
|                          |                 | N                             | Percentage change per IQR (95% CI) (%) | <i>p</i> |
| <b>Gamma-3</b>           | 0               | 216                           | 1.81 (-5.50, 9.68)                     | 0.638    |
|                          | 1               | 221                           | 0.87 (-5.95, 8.19)                     | 0.808    |
|                          | 2               | 221                           | 0.47 (-6.37, 7.82)                     | 0.896    |
|                          | 3               | 221                           | 1.93 (-5.13, 9.52)                     | 0.602    |
|                          | 4               | 221                           | 1.70 (-5.24, 9.15)                     | 0.641    |
|                          | 5               | 221                           | 2.16 (-4.75, 9.58)                     | 0.550    |
|                          | 6               | 221                           | 1.71 (-4.79, 8.65)                     | 0.615    |
|                          | 7               | 221                           | 1.22 (-4.68, 7.49)                     | 0.692    |
| <b>Gamma-4</b>           | 0               | 216                           | 1.87 (-10.13, 15.47)                   | 0.773    |
|                          | 1               | 221                           | 0.23 (-8.97, 10.35)                    | 0.963    |
|                          | 2               | 221                           | 0.60 (-9.23, 11.50)                    | 0.909    |
|                          | 3               | 221                           | 3.57 (-7.25, 15.66)                    | 0.534    |
|                          | 4               | 221                           | 2.14 (-9.07, 14.72)                    | 0.722    |
|                          | 5               | 221                           | 2.64 (-7.53, 13.93)                    | 0.626    |
|                          | 6               | 221                           | 2.28 (-7.11, 12.63)                    | 0.646    |
|                          | 7               | 221                           | 2.03 (-6.88, 11.80)                    | 0.666    |
| <b>Gamma-5</b>           | 0               | 216                           | 7.08 (-3.98, 19.40)                    | 0.221    |
|                          | 1               | 221                           | 5.89 (-4.64, 17.59)                    | 0.285    |

|                |   |     |                     |       |
|----------------|---|-----|---------------------|-------|
|                | 2 | 221 | 6.09 (-4.33, 17.65) | 0.264 |
|                | 3 | 221 | 7.67 (-2.81, 19.27) | 0.159 |
|                | 4 | 221 | 6.80 (-5.40, 20.58) | 0.289 |
|                | 5 | 221 | 8.45 (-3.45, 21.81) | 0.173 |
|                | 6 | 221 | 8.84 (-2.68, 21.73) | 0.140 |
|                | 7 | 221 | 9.10 (-2.45, 22.02) | 0.129 |
| <b>Gamma-6</b> | 0 | 216 | 5.00 (-5.05, 16.11) | 0.343 |
|                | 1 | 221 | 3.51 (-5.03, 12.82) | 0.433 |
|                | 2 | 221 | 2.61 (-4.89, 10.71) | 0.507 |
|                | 3 | 221 | 3.31 (-4.22, 11.44) | 0.400 |
|                | 4 | 221 | 2.66 (-5.29, 11.27) | 0.525 |
|                | 5 | 221 | 3.29 (-4.39, 11.57) | 0.413 |
|                | 6 | 221 | 3.61 (-3.92, 11.73) | 0.358 |
|                | 7 | 221 | 3.62 (-3.56, 11.33) | 0.334 |
| <b>Gamma-7</b> | 0 | 216 | 0.89 (-8.13, 10.79) | 0.853 |
|                | 1 | 221 | 1.31 (-7.89, 11.43) | 0.789 |
|                | 2 | 221 | 0.96 (-8.08, 10.88) | 0.842 |
|                | 3 | 221 | 3.30 (-6.23, 13.80) | 0.511 |
|                | 4 | 221 | 1.45 (-8.55, 12.53) | 0.787 |
|                | 5 | 221 | 2.36 (-7.97, 13.85) | 0.668 |
|                | 6 | 221 | 2.45 (-7.03, 12.90) | 0.626 |
|                | 7 | 221 | 2.31 (-7.61, 13.30) | 0.661 |
| <b>Gamma-8</b> | 0 | 216 | 7.25 (-2.42, 17.89) | 0.148 |
|                | 1 | 221 | 4.55 (-3.35, 13.10) | 0.269 |
|                | 2 | 221 | 5.59 (-2.67, 14.55) | 0.193 |
|                | 3 | 221 | 6.25 (-2.61, 15.91) | 0.174 |
|                | 4 | 221 | 6.62 (-3.01, 17.20) | 0.186 |
|                | 5 | 221 | 7.94 (-1.89, 18.75) | 0.119 |
|                | 6 | 221 | 8.95 (-1.13, 20.07) | 0.085 |
|                | 7 | 221 | 7.74 (-0.72, 16.91) | 0.076 |
| <b>Gamma-9</b> | 0 | 216 | 2.47 (-6.86, 12.74) | 0.617 |
|                | 1 | 221 | 2.87 (-6.88, 13.64) | 0.578 |
|                | 2 | 221 | 3.71 (-6.75, 15.35) | 0.502 |
|                | 3 | 221 | 6.07 (-3.43, 16.51) | 0.220 |
|                | 4 | 221 | 5.52 (-5.62, 17.98) | 0.346 |
|                | 5 | 221 | 7.73 (-3.38, 20.12) | 0.182 |
|                | 6 | 221 | 7.59 (-2.80, 19.09) | 0.160 |
|                | 7 | 221 | 8.81 (-2.21, 21.06) | 0.123 |

Footnotes: 0-7 represent different exposure windows: 0 represents the average indoor PM gamma activity at the urine collection day; 1-7 represents the moving averages from 1 to 7 days before urine collection respectively. *P* is the *p*-value, which represents the significant level of



indoor PM gamma effect:  $P < 0.05$  represents significant, and  $0.05 \leq P < 0.1$  represents marginally significant.
